# Supplementary material for: Computational Study of Catalytic Urethane Formation
Source: MDPI journal article supplement (doi:10.3390/polym14010008), 2021-12-21
Supplement: s1 [file s1]

# Computational Study of Catalytic Urethane Formation

Hadeer Q. Waleed <sup>1</sup>, Marcell Csécsi <sup>1</sup>, Rachid Hadjadj <sup>1</sup>, Ravikumar Thangaraj <sup>1</sup>, Dániel Pecsmány<sup>1,2</sup>, Michael Owen <sup>1,2</sup>, Milán Szóri <sup>1</sup>, Zsolt Fejes <sup>1</sup>, Béla Viskolcz <sup>1</sup> and Béla Fiser <sup>1,2,3,\*</sup>

<sup>1</sup> Institute of Chemistry, University of Miskolc, 3515 Miskolc-Egyetemváros, Hungary; kemHader@uni-miskolc.hu (H.Q.W.); csecsi.marcell2@gmail.com (M.C.); hrachid.chemeng@gmail.com (R.H.); ravikumar8019@gmail.com (R.T.); pecsmany.daniel@gmail.com (D.P.); michael.owen@uni-miskolc.hu (M.O.); milan.szori@uni-miskolc.hu (M.S.); zsolt.fejes@gmail.com (Z.F.); bela.viskolcz@uni-miskolc.hu (B.V.)

<sup>2</sup> Higher Education and Industrial Cooperation Centre, University of Miskolc, 3515 Miskolc-Egyetemváros, Hungary

<sup>3</sup> Ferenc Rákóczi II, Transcarpathian Hungarian College of Higher Education, 90200 Beregszász, Transcarpathia, Ukraine

\* Correspondence: kemfiser@uni-miskolc.hu

## Supporting Information

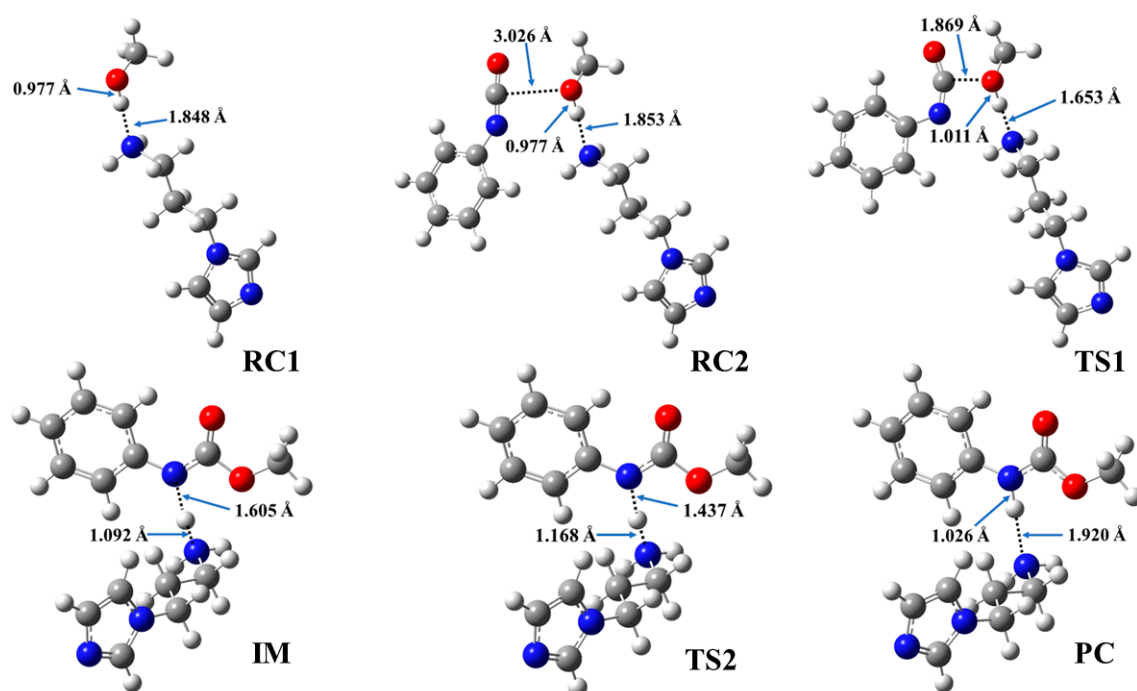

**Figure S1.** Optimized structures along the reaction pathway between phenyl isocyanate (PhNCO) and methanol in the presence of catalyst **2** calculated at the BHandHLYP/6-31G(d) level of theory in acetonitrile at 298.15 K and 1 atm. RC – reactant complex, TS – transition state, IM – intermediate, PC – product complex.

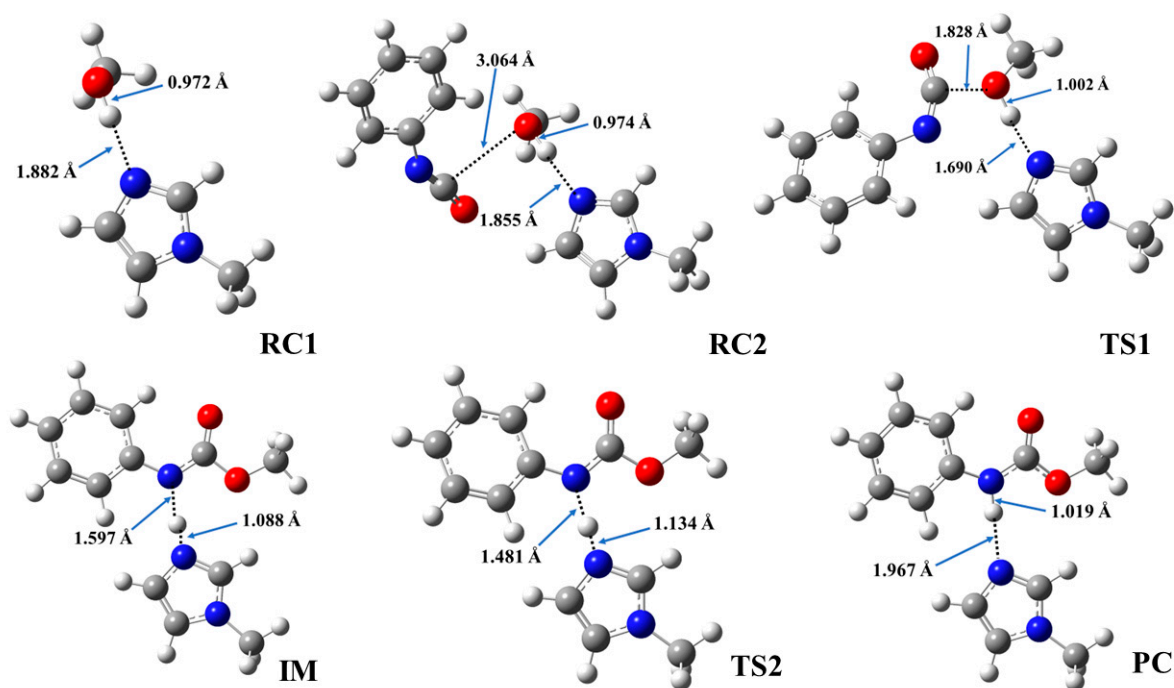

**Figure S2.** Optimized structures along the reaction pathway between phenyl isocyanate (PhNCO) and methanol in the presence of catalyst **3** calculated at the BHandHLYP/6-31G(d) level of theory in acetonitrile at 298.15 K and 1 atm. RC – reactant complex, TS – transition state, IM – intermediate, PC – product complex.

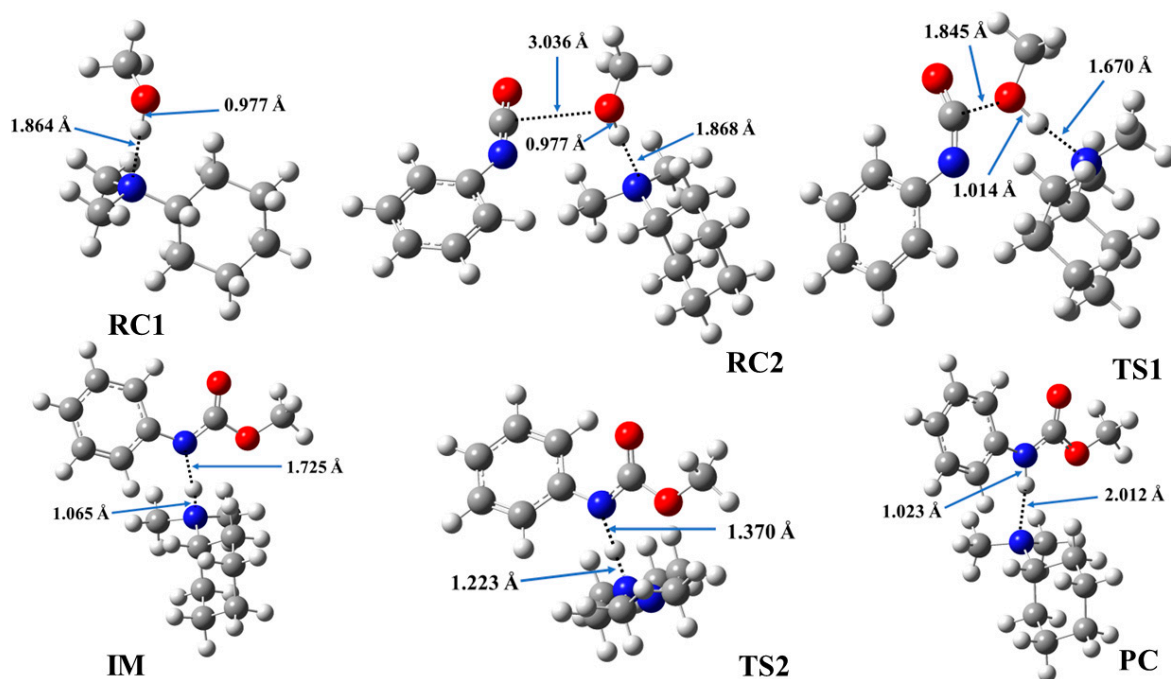

**Figure S3.** Optimized structures along the reaction pathway between phenyl isocyanate (PhNCO) and methanol in the presence of catalyst **4** calculated at the BHandHLYP/6-31G(d) level of theory in acetonitrile at 298.15 K and 1 atm. RC – reactant complex, TS – transition state, IM – intermediate, PC – product complex.

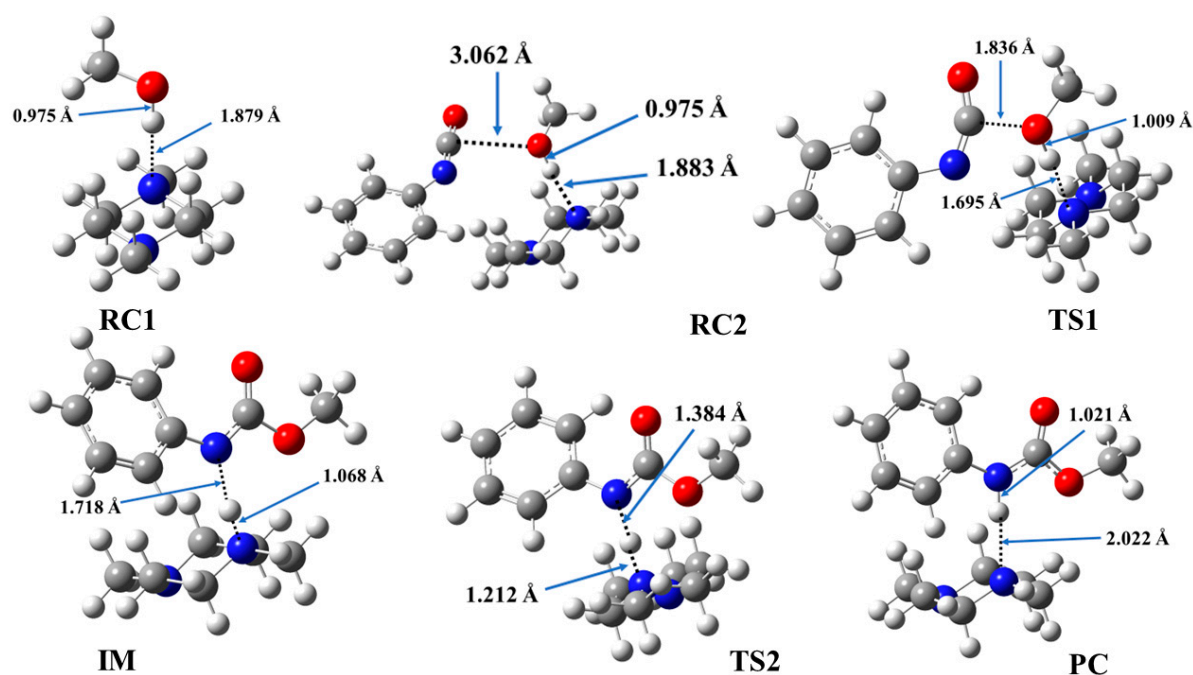

**Figure S4.** Optimized structures along the reaction pathway between phenyl isocyanate (PhNCO) and methanol in the presence of catalyst **5** calculated at the BHandHLYP/6-31G(d) level of theory in acetonitrile at 298.15 K and 1 atm. RC – reactant complex, TS – transition state, IM – intermediate, PC – product complex.

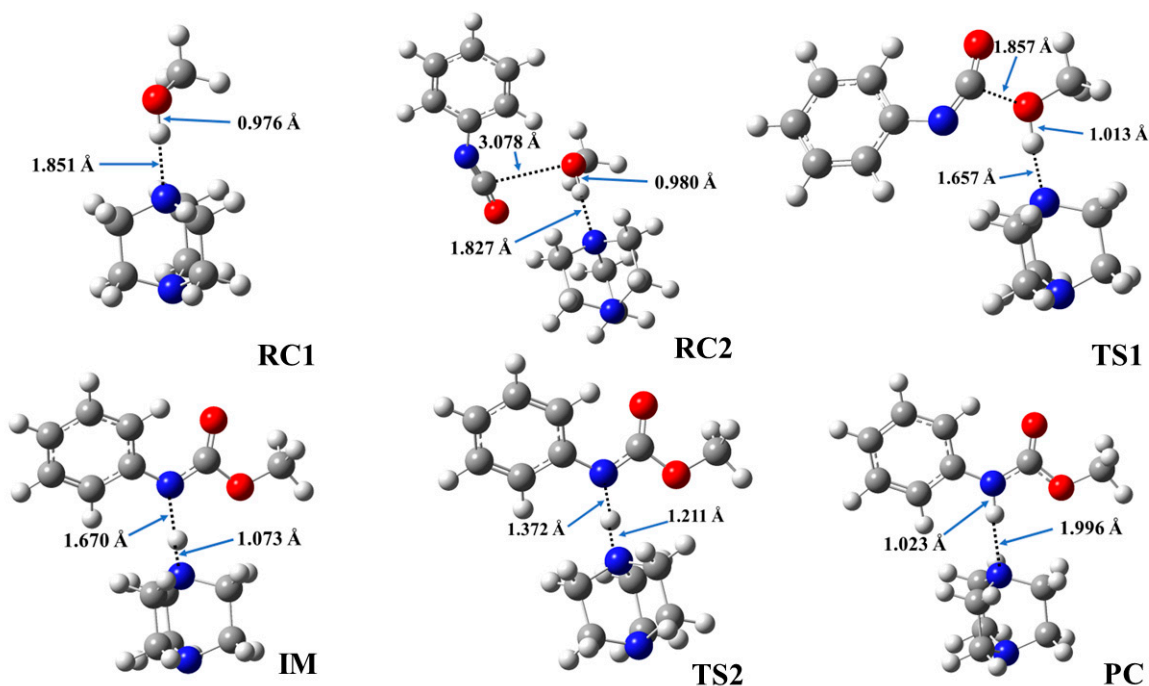

**Figure S5.** Optimized structures along the reaction pathway between phenyl isocyanate (PhNCO) and methanol in the presence of catalyst **6** calculated at the BHandHLYP/6-31G(d) level of theory in acetonitrile at 298.15 K and 1 atm. RC – reactant complex, TS – transition state, IM – intermediate, PC – product complex.

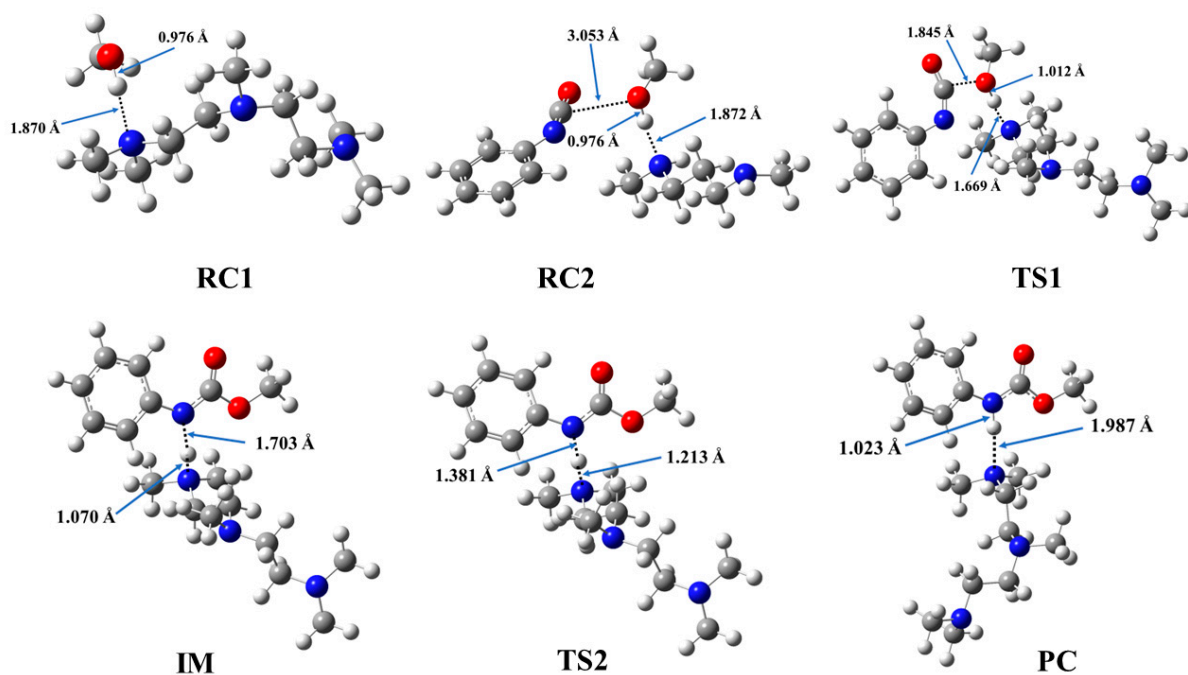

**Figure S6.** Optimized structures along the reaction pathway between phenyl isocyanate (PhNCO) and methanol in the presence of catalyst **7** calculated at the BHandHLYP/6-31G(d) level of theory in acetonitrile at 298.15 K and 1 atm. RC – reactant complex, TS – transition state, IM – intermediate, PC – product complex.

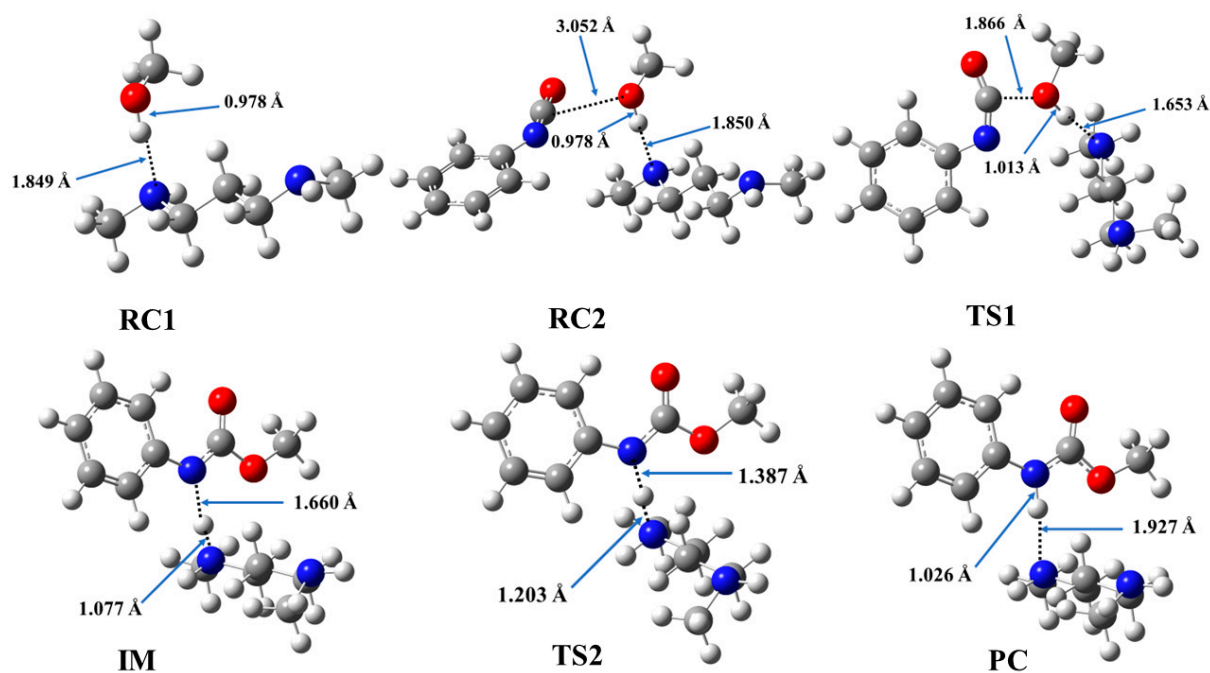

**Figure S7.** Optimized structures along the reaction pathway between phenyl isocyanate (PhNCO) and methanol in the presence of catalyst **8** calculated at the BHandHLYP/6-31G(d) level of theory in acetonitrile at 298.15 K and 1 atm. RC – reactant complex, TS – transition state, IM – intermediate, PC – product complex.

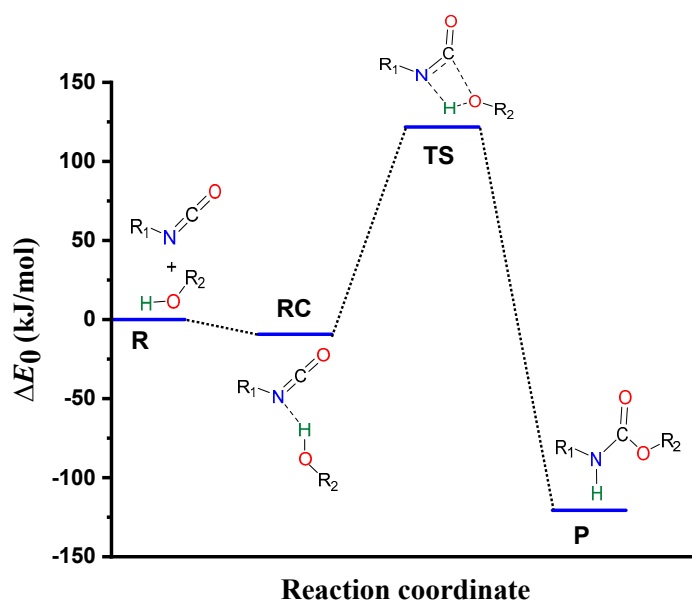

**Figure S8.** Energy profile (zero-point corrected,  $\Delta E_0$ ) of the phenyl isocyanate (PhNCO) and methanol reaction calculated at the BHandHLYP/6-31G(d) level of theory in acetonitrile using the SMD implicit solvent model at 298.15 K and 1 atm.

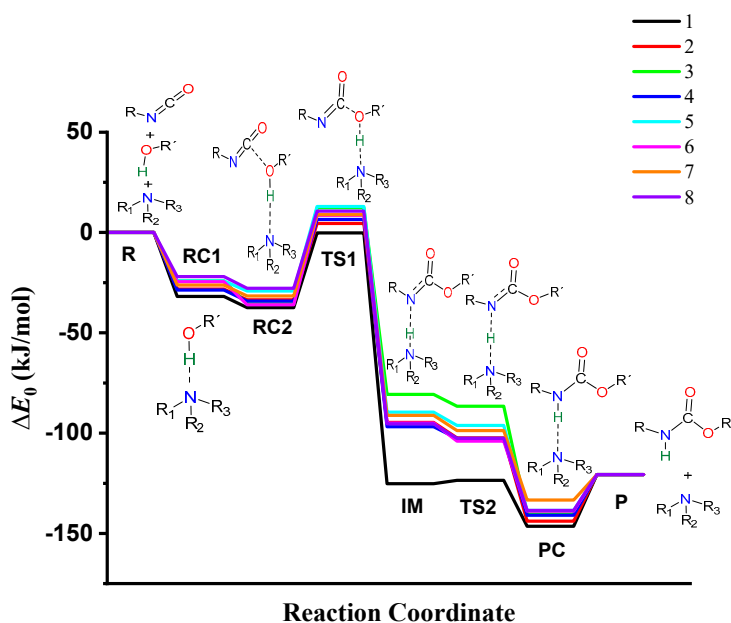

**Figure S9.** Energy profile (zero-point corrected,  $\Delta E_0$ ) of the catalyzed urethane formation reactions calculated at the BHandHLYP/6-31G(d) level of theory in acetonitrile using the SMD implicit solvent model at 298.15 K and 1 atm.

**Table S1.** Computed and measured proton affinities (PA) in kJ/mol. The calculations have been carried out at the BHandHLYP level of theory in gas phase at 298.15 K and 1 atm.  $\text{RNH}_2$ ,  $\text{R}_2\text{NH}$ ,  $\text{R}_3\text{N}$ , and  $\text{R}_2\text{C}=\text{N}-\text{R}$ : primary, secondary, tertiary amines, and secondary ketimine, respectively. •side, •• middle amine group.

| Catalysts | $\text{PA}_{\text{calc}}$ |                       |                      |                                        | $\text{PA}_{\text{exp}}^{29}$ |
|-----------|---------------------------|-----------------------|----------------------|----------------------------------------|-------------------------------|
|           | $\text{RNH}_2$            | $\text{R}_2\text{NH}$ | $\text{R}_3\text{N}$ | $\text{R}_2\text{C}=\text{N}-\text{R}$ |                               |
| 1         | -                         | -                     | 916.7                | 1065.4                                 | -                             |

|   |       |       |                   |   |        |
|---|-------|-------|-------------------|---|--------|
| 2 | 898.5 | 987.5 | 776.3             | - | -      |
| 3 | -     | 975.8 | 760.6             | - | 959.6  |
| 4 | -     | -     | 983.5             | - | 983.6  |
| 5 | -     | -     | 969.9             | - | -      |
| 6 | -     | -     | 972.4             | - | 963.4  |
| 7 | -     | -     | 969.3•<br>965.1•• | - | -      |
| 8 | -     | 954.0 | -                 | - | 1035.2 |

**Table S2.** Zero-point corrected relative energies ( $\Delta E_0$ ), relative enthalpies ( $\Delta H$ ), and Gibbs free energies ( $\Delta G$ ) of the species in the reaction between phenyl isocyanate (PhNCO) and methanol with and without catalysts, calculated at the BHandHLYP/6-31G(d) level of theory in acetonitrile using the SMD implicit solvent model at 298.15 K and 1 atm. Cat. – catalyst, R – reactant, RC – reactant complex, TS – transition state, IM – intermediate, PC – product complex, P – product.

| $\Delta E_0$ (kJ/mol) |      |        |        |        |         |         |         |         |
|-----------------------|------|--------|--------|--------|---------|---------|---------|---------|
|                       | R    | RC1    | RC2    | TS1    | IM      | TS2     | PC      | P       |
| <b>Cat.-free</b>      | 0.00 | -      | -9.36* | 121.87 | -       | -       | -       | -120.67 |
| <b>Cat.1</b>          | 0.00 | -31.81 | -37.43 | -0.19  | -125.23 | -123.51 | -146.44 | -120.67 |
| <b>Cat.2</b>          | 0.00 | -28.22 | -33.55 | 4.45   | -94.59  | -102.39 | -143.83 | -120.67 |
| <b>Cat.3</b>          | 0.00 | -24.06 | -35.61 | 12.35  | -80.63  | -86.60  | -140.27 | -120.67 |
| <b>Cat.4</b>          | 0.00 | -28.72 | -34.24 | 6.51   | -96.81  | -102.68 | -140.90 | -120.67 |
| <b>Cat.5</b>          | 0.00 | -24.13 | -29.11 | 12.99  | -89.53  | -96.15  | -138.47 | -120.67 |
| <b>Cat.6</b>          | 0.00 | -24.51 | -36.02 | 8.56   | -94.99  | -104.00 | -138.83 | -120.67 |
| <b>Cat.7</b>          | 0.00 | -26.16 | -31.66 | 8.88   | -91.15  | -98.69  | -133.29 | -120.67 |
| <b>Cat.8</b>          | 0.00 | -22.03 | -27.77 | 10.72  | -95.35  | -102.65 | -138.53 | -120.67 |
| $\Delta H$ (kJ/mol)   |      |        |        |        |         |         |         |         |
|                       | R    | RC1    | RC2    | TS1    | IM      | TS2     | PC      | P       |
| <b>Cat.-free</b>      | 0.00 | -      | -5.32* | 120.36 | -       | -       | -       | -121.89 |
| <b>Cat.1</b>          | 0.00 | -31.03 | -31.09 | 1.41   | -124.70 | -123.70 | -145.15 | -121.89 |
| <b>Cat.2</b>          | 0.00 | -27.28 | -27.39 | 5.87   | -95.06  | -103.95 | -143.10 | -121.89 |
| <b>Cat.3</b>          | 0.00 | -22.90 | -29.10 | 13.55  | -80.95  | -88.19  | -138.95 | -121.89 |

|                                       |          |            |            |            |           |            |           |          |
|---------------------------------------|----------|------------|------------|------------|-----------|------------|-----------|----------|
| <b>Cat.4</b>                          | 0.00     | -28.24     | -28.14     | 7.90       | -96.69    | -103.52    | -140.04   | -121.89  |
| <b>Cat.5</b>                          | 0.00     | -23.37     | -22.60     | 14.21      | -89.50    | -97.02     | -137.66   | -121.89  |
| <b>Cat.6</b>                          | 0.00     | -23.60     | -29.75     | 9.99       | -94.64    | -104.39    | -137.64   | -121.89  |
| <b>Cat.7</b>                          | 0.00     | -25.32     | -25.32     | 10.01      | -91.16    | -99.41     | -132.46   | -121.89  |
| <b>Cat.8</b>                          | 0.00     | -21.49     | -21.46     | 11.83      | -95.54    | -103.89    | -137.78   | -121.89  |
| <b><math>\Delta G</math> (kJ/mol)</b> |          |            |            |            |           |            |           |          |
|                                       | <b>R</b> | <b>RC1</b> | <b>RC2</b> | <b>TS1</b> | <b>IM</b> | <b>TS2</b> | <b>PC</b> | <b>P</b> |
| <b>Cat.-free</b>                      | 0.00     | -          | 27.84*     | 171.78     | -         | -          | -         | -71.72   |
| <b>Cat.1</b>                          | 0.00     | 7.60       | 44.58      | 93.02      | -28.85    | -26.12     | -54.47    | -71.72   |
| <b>Cat.2</b>                          | 0.00     | 5.95       | 45.17      | 92.13      | 1.39      | -6.63      | -53.18    | -71.72   |
| <b>Cat.3</b>                          | 0.00     | 10.95      | 40.93      | 104.40     | 17.23     | 11.13      | -50.86    | -71.72   |
| <b>Cat.4</b>                          | 0.00     | 12.92      | 47.73      | 100.66     | 2.46      | -0.61      | -44.01    | -71.72   |
| <b>Cat.5</b>                          | 0.00     | 14.71      | 49.51      | 106.38     | 9.17      | 5.09       | -42.77    | -71.72   |
| <b>Cat.6</b>                          | 0.00     | 11.75      | 43.16      | 99.51      | 1.35      | -6.74      | -46.93    | -71.72   |
| <b>Cat.7</b>                          | 0.00     | 11.06      | 47.71      | 103.40     | 7.30      | 1.10       | -38.48    | -71.72   |
| <b>Cat.8</b>                          | 0.00     | 15.49      | 46.44      | 101.26     | -0.19     | -4.74      | -46.91    | -71.72   |

\* RC for catalyst-free reaction

**Table S3.** Relative enthalpies ( $\Delta H$ ), and Gibbs free energies ( $\Delta G$ ) of the species in the reaction between phenyl isocyanate (PhNCO) and methanol with and without catalysts, calculated at the G3MP2BHandHLYP level of theory in acetonitrile using the SMD implicit solvent model at 298.15 K and 1 atm. Cat. – catalyst, R – reactant, RC – reactant complex, TS – transition state, IM – intermediate, PC – product complex, P – product.

|                                       |          |            |            |            |           |            |           |          |
|---------------------------------------|----------|------------|------------|------------|-----------|------------|-----------|----------|
| <b><math>\Delta H</math> (kJ/mol)</b> |          |            |            |            |           |            |           |          |
|                                       | <b>R</b> | <b>RC1</b> | <b>RC2</b> | <b>TS1</b> | <b>IM</b> | <b>TS2</b> | <b>PC</b> | <b>P</b> |
| <b>Cat.-free</b>                      | 0.00     | -          | -6.65*     | 116.19     | -         | -          | -         | -94.03   |
| <b>Cat.1</b>                          | 0.00     | -26.65     | -36.84     | -3.07      | -114.92   | -119.39    | -126.33   | -94.03   |
| <b>Cat.2</b>                          | 0.00     | -15.32     | -22.27     | 16.67      | -77.74    | -87.00     | -113.12   | -94.03   |
| <b>Cat.3</b>                          | 0.00     | -18.83     | -25.01     | 15.06      | -68.43    | -76.75     | -113.90   | -94.03   |
| <b>Cat.4</b>                          | 0.00     | -26.35     | -35.16     | -3.07      | -102.27   | -112.89    | -127.46   | -94.03   |
| <b>Cat.5</b>                          | 0.00     | -25.01     | -34.70     | 2.58       | -95.00    | -106.62    | -124.98   | -94.03   |
| <b>Cat.6</b>                          | 0.00     | -24.94     | -33.37     | 1.81       | -94.66    | -106.20    | -121.82   | -94.03   |
| <b>Cat.7</b>                          | 0.00     | -26.21     | -35.90     | -2.58      | -98.79    | -109.85    | -118.24   | -94.03   |
| <b>Cat.8</b>                          | 0.00     | -18.52     | -26.63     | 8.24       | -91.59    | -101.26    | -119.00   | -94.03   |
| <b><math>\Delta G</math> (kJ/mol)</b> |          |            |            |            |           |            |           |          |
|                                       | <b>R</b> | <b>RC1</b> | <b>RC2</b> | <b>TS1</b> | <b>IM</b> | <b>TS2</b> | <b>PC</b> | <b>P</b> |
| <b>Cat.-free</b>                      | 0.00     | -          | 28.99*     | 170.09     | -         | -          | -         | -41.38   |
| <b>Cat.1</b>                          | 0.00     | 11.97      | 41.31      | 91.02      | -16.60    | -19.33     | -33.17    | -41.38   |
| <b>Cat.2</b>                          | 0.00     | 17.91      | 52.76      | 105.40     | 21.19     | 12.79      | -20.74    | -41.38   |
| <b>Cat.3</b>                          | 0.00     | 15.02      | 47.50      | 108.38     | 32.23     | 25.05      | -23.33    | -41.38   |
| <b>Cat.4</b>                          | 0.00     | 14.97      | 43.36      | 92.34      | -0.50     | -7.34      | -28.79    | -41.38   |
| <b>Cat.5</b>                          | 0.00     | 13.07      | 39.88      | 97.22      | 6.15      | -2.04      | -27.61    | -41.38   |
| <b>Cat.6</b>                          | 0.00     | 10.41      | 42.02      | 93.80      | 3.80      | -6.07      | -28.64    | -41.38   |







|          |          |          |          |           |          |          |          |
|----------|----------|----------|----------|-----------|----------|----------|----------|
| C        | 2.82454  | -1.26837 | -0.83146 | C         | 3.51047  | -1.41702 | -0.94150 |
| C        | 3.50876  | -0.18540 | -0.29355 | C         | 3.56503  | -0.14508 | -0.37295 |
| C        | 4.86176  | -0.29204 | 0.01464  | C         | 4.79444  | 0.33785  | 0.07857  |
| H        | 5.38256  | 0.55382  | 0.43331  | H         | 4.85938  | 1.31826  | 0.51960  |
| H        | 6.57047  | -1.56624 | 0.01885  | H         | 6.87637  | -0.05334 | 0.31632  |
| H        | 2.96269  | -3.29608 | -1.48006 | H         | 4.58958  | -3.17101 | -1.49746 |
| H        | 1.77727  | -1.16507 | -1.06249 | H         | 2.55932  | -1.78571 | -1.28993 |
| N        | 2.80049  | 0.99328  | -0.07667 | N         | 2.35262  | 0.56239  | -0.29841 |
| O        | 3.00713  | 3.21759  | 0.67553  | O         | 2.76195  | 2.66203  | 0.71413  |
| H        | -0.14873 | 1.81075  | -0.30116 | H         | -0.08233 | 1.23666  | 0.09125  |
| H        | -0.12524 | 4.63535  | -0.14719 | H         | -0.96420 | 3.49929  | 0.35841  |
| H        | 5.36518  | -3.49829 | -0.93914 | H         | 6.76510  | -2.30777 | -0.69145 |
| C        | -5.04136 | -1.04423 | -0.25019 | C         | -5.33265 | -0.59624 | -0.39795 |
| C        | -5.03390 | 0.06484  | -1.29505 | C         | -5.18111 | 0.71723  | -1.15585 |
| C        | -3.87024 | 1.04351  | -1.19051 | C         | -3.89407 | 1.48329  | -0.87328 |
| C        | -3.76647 | -1.88093 | -0.23667 | C         | -4.18791 | -1.57613 | -0.63158 |
| C        | -2.48127 | 0.41208  | -1.35139 | C         | -2.60857 | 0.72354  | -1.22465 |
| C        | -1.93781 | -0.22460 | -0.09701 | C         | -2.15817 | -0.25192 | -0.16846 |
| H        | -5.19812 | -0.62980 | 0.74587  | H         | -5.42201 | -0.41195 | 0.67273  |
| H        | -5.01195 | -0.39262 | -2.28564 | H         | -5.22918 | 0.50709  | -2.22556 |
| H        | -3.91490 | 1.57961  | -0.24229 | H         | -3.85816 | 1.78766  | 0.17275  |
| H        | -2.50451 | -0.31871 | -2.15947 | H         | -2.73806 | 0.20419  | -2.17342 |
| H        | -3.48667 | -2.15024 | -1.25318 | H         | -3.95343 | -1.63332 | -1.69242 |
| H        | -5.88156 | -1.70786 | -0.45150 | H         | -6.25831 | -1.07579 | -0.71371 |
| H        | -5.96933 | 0.61951  | -1.23290 | H         | -6.03137 | 1.35911  | -0.92934 |
| H        | -3.98508 | 1.79329  | -1.97122 | H         | -3.90686 | 2.40013  | -1.45947 |
| H        | -3.95038 | -2.81289 | 0.28693  | H         | -4.49591 | -2.57185 | -0.33242 |
| H        | -1.76653 | 1.17643  | -1.63266 | H         | -1.79428 | 1.42555  | -1.36166 |
| N        | -2.64112 | -1.25093 | 0.44200  | N         | -2.98051 | -1.28070 | 0.13209  |
| N        | -0.85914 | 0.27731  | 0.39681  | N         | -1.02578 | -0.02244 | 0.40554  |
| C        | -0.32366 | -0.30483 | 1.61398  | C         | -0.55771 | -0.94081 | 1.42742  |
| C        | -1.42148 | -0.83202 | 2.51962  | C         | -1.71153 | -1.53788 | 2.20998  |
| H        | -1.00862 | -1.32434 | 3.39627  | H         | -1.36156 | -2.27913 | 2.92333  |
| H        | -2.03533 | -0.00106 | 2.86360  | H         | -2.21442 | -0.75020 | 2.76842  |
| H        | 0.26498  | 0.45428  | 2.12395  | H         | 0.11798  | -0.40031 | 2.08551  |
| H        | 0.36500  | -1.11500 | 1.36475  | H         | 0.02819  | -1.73737 | 0.96492  |
| C        | -2.27519 | -1.80853 | 1.73853  | C         | -2.68338 | -2.17967 | 1.24272  |
| H        | -1.74294 | -2.75002 | 1.59752  | H         | -2.27589 | -3.11432 | 0.85684  |
| H        | -3.19037 | -2.03268 | 2.28056  | H         | -3.61840 | -2.41556 | 1.74352  |
| Cat.1-IM |          |          |          | Cat.1-TS2 |          |          |          |
| O        | 0.46849  | 2.11832  | 0.89186  | O         | 0.39123  | 2.21547  | 0.82408  |
| C        | 1.74162  | 1.74482  | 0.55184  | C         | 1.64057  | 1.82008  | 0.47410  |
| C        | 0.30208  | 3.46494  | 1.27268  | C         | 0.24524  | 3.58288  | 1.15063  |
| H        | -0.74459 | 3.57806  | 1.53277  | H         | -0.79534 | 3.71466  | 1.42254  |
| H        | 0.91670  | 3.71687  | 2.13213  | H         | 0.87834  | 3.85879  | 1.98816  |
| C        | 5.13768  | -1.75177 | -0.97220 | C         | 4.95180  | -1.82252 | -0.94102 |
| C        | 5.29870  | -0.43823 | -0.55862 | C         | 5.15514  | -0.53256 | -0.47641 |
| C        | 3.85387  | -2.28421 | -0.98706 | C         | 3.64969  | -2.29704 | -1.02867 |
| C        | 2.77046  | -1.51997 | -0.59811 | C         | 2.58236  | -1.49851 | -0.66116 |
| C        | 2.91062  | -0.18463 | -0.17296 | C         | 2.77378  | -0.19114 | -0.18658 |
| C        | 4.21779  | 0.33830  | -0.16631 | C         | 4.09296  | 0.27745  | -0.10194 |

|          |          |          |          |          |          |          |          |
|----------|----------|----------|----------|----------|----------|----------|----------|
| H        | 4.36906  | 1.35308  | 0.14709  | H        | 4.27380  | 1.27376  | 0.25187  |
| H        | 6.28625  | -0.00125 | -0.53822 | H        | 6.15859  | -0.14204 | -0.39916 |
| H        | 3.69461  | -3.30350 | -1.30540 | H        | 3.46066  | -3.29644 | -1.38939 |
| H        | 1.77971  | -1.94695 | -0.61971 | H        | 1.57785  | -1.88070 | -0.74350 |
| N        | 1.74904  | 0.46268  | 0.20286  | N        | 1.63389  | 0.51423  | 0.18165  |
| O        | 2.63879  | 2.58003  | 0.60372  | O        | 2.55957  | 2.62260  | 0.45291  |
| H        | 0.17893  | -0.35404 | 0.39197  | H        | 0.49797  | -0.13538 | 0.32268  |
| H        | 0.54729  | 4.14425  | 0.46074  | H        | 0.48404  | 4.21968  | 0.30426  |
| H        | 5.98587  | -2.34477 | -1.27498 | H        | 5.78518  | -2.44286 | -1.22923 |
| C        | -4.66105 | 0.38584  | -0.85946 | C        | -4.59951 | 0.21380  | -0.84692 |
| C        | -3.87560 | 1.46615  | -1.59281 | C        | -3.86425 | 1.21360  | -1.73074 |
| C        | -2.43326 | 1.64214  | -1.13336 | C        | -2.41134 | 1.46975  | -1.34832 |
| C        | -4.03322 | -0.99871 | -0.95127 | C        | -3.93373 | -1.15555 | -0.78346 |
| C        | -1.55235 | 0.39740  | -1.30011 | C        | -1.50771 | 0.23147  | -1.40130 |
| C        | -1.73780 | -0.61933 | -0.21327 | C        | -1.60650 | -0.64837 | -0.18548 |
| H        | -4.78597 | 0.64671  | 0.19111  | H        | -4.70276 | 0.60121  | 0.16653  |
| H        | -3.87437 | 1.23153  | -2.65807 | H        | -3.89230 | 0.85241  | -2.75991 |
| H        | -2.40053 | 1.96803  | -0.09519 | H        | -2.35064 | 1.91442  | -0.35614 |
| H        | -1.74967 | -0.07550 | -2.26048 | H        | -1.73484 | -0.35523 | -2.29012 |
| H        | -3.70847 | -1.20518 | -1.96762 | H        | -3.64336 | -1.48231 | -1.77913 |
| H        | -5.65887 | 0.32558  | -1.29052 | H        | -5.60731 | 0.07832  | -1.23671 |
| H        | -4.39566 | 2.41666  | -1.48592 | H        | -4.40304 | 2.15991  | -1.72090 |
| H        | -1.97829 | 2.43720  | -1.71960 | H        | -1.99940 | 2.20279  | -2.03880 |
| H        | -4.76415 | -1.75567 | -0.69569 | H        | -4.63858 | -1.88933 | -0.41033 |
| H        | -0.50894 | 0.68626  | -1.28947 | H        | -0.47326 | 0.54140  | -1.48146 |
| N        | -2.91040 | -1.20282 | -0.03109 | N        | -2.77984 | -1.21686 | 0.11238  |
| N        | -0.70805 | -0.87564 | 0.55248  | N        | -0.53871 | -0.78574 | 0.53933  |
| C        | -0.74996 | -1.80762 | 1.66551  | C        | -0.55344 | -1.58834 | 1.74780  |
| C        | -2.15900 | -1.85976 | 2.21734  | C        | -1.92725 | -1.56118 | 2.38680  |
| H        | -2.24697 | -2.64690 | 2.95932  | H        | -1.97496 | -2.23882 | 3.23416  |
| H        | -2.39663 | -0.91436 | 2.69956  | H        | -2.13920 | -0.55702 | 2.74841  |
| H        | -0.04119 | -1.46056 | 2.40918  | H        | 0.20188  | -1.18807 | 2.41832  |
| H        | -0.43044 | -2.79254 | 1.33110  | H        | -0.26757 | -2.61385 | 1.51425  |
| C        | -3.13697 | -2.11982 | 1.09021  | C        | -2.96192 | -1.96312 | 1.35676  |
| H        | -3.05191 | -3.14287 | 0.72946  | H        | -2.90221 | -3.03035 | 1.14752  |
| H        | -4.15573 | -1.96959 | 1.42985  | H        | -3.96262 | -1.75524 | 1.72213  |
| Cat.1-PC |          |          |          |          |          |          |          |
|          | O        | 0.64512  | 2.38825  | 0.43457  |          |          |          |
|          | C        | 1.86723  | 1.90978  | 0.17266  |          |          |          |
|          | C        | 0.53823  | 3.80275  | 0.51341  |          |          |          |
|          | H        | -0.50367 | 4.00477  | 0.72576  |          |          |          |
|          | H        | 1.16114  | 4.19388  | 1.31049  |          |          |          |
|          | C        | 4.92248  | -2.19116 | -0.55543 |          |          |          |
|          | C        | 5.20321  | -0.83454 | -0.56425 |          |          |          |
|          | C        | 3.61791  | -2.60354 | -0.32105 |          |          |          |
|          | C        | 2.61621  | -1.67630 | -0.09957 |          |          |          |
|          | C        | 2.89972  | -0.30798 | -0.10784 |          |          |          |
|          | C        | 4.20964  | 0.10882  | -0.34419 |          |          |          |
|          | H        | 4.44284  | 1.15556  | -0.35418 |          |          |          |
|          | H        | 6.21098  | -0.49449 | -0.74466 |          |          |          |
|          | H        | 3.37478  | -3.65428 | -0.30951 |          |          |          |

|   |          |          |          |
|---|----------|----------|----------|
| H | 1.60484  | -2.00138 | 0.08259  |
| N | 1.82765  | 0.55910  | 0.12722  |
| O | 2.83330  | 2.62106  | 0.00863  |
| H | 0.91203  | 0.12427  | 0.29482  |
| H | 0.82121  | 4.26517  | -0.42588 |
| H | 5.70334  | -2.91401 | -0.72747 |
| C | -4.60613 | 0.09668  | -1.16612 |
| C | -3.73363 | 0.40525  | -2.37646 |
| C | -2.24817 | 0.57611  | -2.07900 |
| C | -4.17176 | -1.14837 | -0.39960 |
| C | -1.57086 | -0.65512 | -1.46357 |
| C | -1.76317 | -0.79106 | 0.02575  |
| H | -4.61983 | 0.94286  | -0.47894 |
| H | -3.84877 | -0.40307 | -3.10058 |
| H | -2.08916 | 1.43596  | -1.42817 |
| H | -1.91997 | -1.55486 | -1.96941 |
| H | -3.96456 | -1.96090 | -1.09296 |
| H | -5.63115 | -0.05169 | -1.50404 |
| H | -4.10311 | 1.30787  | -2.86148 |
| H | -1.73817 | 0.80190  | -3.01373 |
| H | -4.98519 | -1.48729 | 0.23295  |
| H | -0.50033 | -0.59852 | -1.62436 |
| N | -3.03127 | -0.94105 | 0.48329  |
| N | -0.71114 | -0.71872 | 0.76423  |
| C | -0.87414 | -0.82339 | 2.20230  |
| C | -2.19077 | -0.22914 | 2.66768  |
| H | -2.33235 | -0.36698 | 3.73645  |
| H | -2.19198 | 0.84108  | 2.46721  |
| H | -0.03565 | -0.31741 | 2.67622  |
| H | -0.81743 | -1.87103 | 2.50658  |
| C | -3.32218 | -0.89283 | 1.91143  |
| H | -3.48898 | -1.90305 | 2.28706  |
| H | -4.24782 | -0.33997 | 2.04953  |

| Cat.2 |          |          |          | Cat.2-RC1 |          |          |          |
|-------|----------|----------|----------|-----------|----------|----------|----------|
| C     | -1.83990 | -1.05366 | -0.20526 | C         | -5.49711 | 0.82299  | -0.18007 |
| C     | -2.86213 | 0.80926  | -0.22848 | H         | -4.84553 | 1.68426  | -0.00746 |
| C     | -1.63852 | 1.05344  | 0.31448  | H         | -5.62645 | 0.71700  | -1.26099 |
| N     | -0.99002 | -0.15208 | 0.32629  | H         | -6.47022 | 1.05553  | 0.24669  |
| H     | -1.56968 | -2.08797 | -0.30835 | O         | -5.01969 | -0.34377 | 0.42306  |
| H     | -3.66128 | 1.50649  | -0.39945 | H         | -4.14085 | -0.53058 | 0.03797  |
| H     | -1.17934 | 1.94677  | 0.68977  | C         | 3.11095  | 1.17767  | -0.11383 |
| N     | -2.98090 | -0.51628 | -0.55202 | C         | 4.31044  | -0.57185 | -0.24241 |
| C     | 0.36546  | -0.40319 | 0.78501  | C         | 3.10847  | -0.97052 | 0.25571  |
| H     | 0.46585  | -1.47610 | 0.91248  | N         | 2.34527  | 0.16313  | 0.33578  |
| H     | 0.48228  | 0.05633  | 1.76233  | H         | 2.74247  | 2.18574  | -0.15133 |
| C     | 1.41793  | 0.12134  | -0.17966 | H         | 5.17645  | -1.17479 | -0.44357 |
| H     | 1.29683  | 1.19505  | -0.30972 | H         | 2.73342  | -1.92804 | 0.55934  |
| H     | 1.26811  | -0.34057 | -1.15552 | N         | 4.30394  | 0.77838  | -0.47179 |
| C     | 2.82715  | -0.16699 | 0.30963  | C         | 0.96529  | 0.24972  | 0.78148  |
| H     | 2.93726  | -1.24303 | 0.47630  | H         | 0.75678  | 1.29715  | 0.97462  |

|           |          |          |          |           |          |          |          |
|-----------|----------|----------|----------|-----------|----------|----------|----------|
| H         | 2.98147  | 0.31604  | 1.27310  | H         | 0.87995  | -0.28227 | 1.72458  |
| N         | 3.80885  | 0.37007  | -0.62515 | C         | -0.01737 | -0.30999 | -0.23677 |
| H         | 4.73766  | 0.20017  | -0.26693 | H         | 0.21708  | -1.35576 | -0.43261 |
| H         | 3.75544  | -0.14641 | -1.49222 | H         | 0.09367  | 0.22811  | -1.17757 |
|           |          |          |          | C         | -1.45666 | -0.19826 | 0.24798  |
|           |          |          |          | H         | -1.70138 | 0.84477  | 0.43857  |
|           |          |          |          | H         | -1.56973 | -0.72571 | 1.19299  |
|           |          |          |          | N         | -2.44971 | -0.72850 | -0.68100 |
|           |          |          |          | H         | -2.25452 | -1.70227 | -0.86969 |
|           |          |          |          | H         | -2.37414 | -0.25261 | -1.56957 |
| Cat.2-RC2 |          |          |          | Cat.2-TS1 |          |          |          |
| C         | 2.33455  | -3.11695 | -0.58404 | C         | 2.93308  | -3.29476 | -0.12472 |
| C         | 3.35551  | -3.81332 | 0.04539  | C         | 4.29917  | -3.47325 | 0.04287  |
| C         | 4.42512  | -3.11778 | 0.59264  | C         | 5.11995  | -2.35916 | 0.13903  |
| C         | 4.47861  | -1.73662 | 0.51453  | C         | 4.59063  | -1.07994 | 0.07009  |
| C         | 3.45023  | -1.04418 | -0.11808 | C         | 3.21685  | -0.89668 | -0.09795 |
| C         | 2.37774  | -1.73449 | -0.66851 | C         | 2.39697  | -2.02028 | -0.19460 |
| H         | 1.50052  | -3.64846 | -1.01286 | H         | 2.28057  | -4.15010 | -0.20155 |
| H         | 3.31946  | -4.88857 | 0.10932  | H         | 4.71759  | -4.46520 | 0.09741  |
| H         | 5.22351  | -3.65076 | 1.08325  | H         | 6.18366  | -2.48215 | 0.26914  |
| H         | 5.30725  | -1.19247 | 0.93808  | H         | 5.24294  | -0.22649 | 0.14614  |
| H         | 1.59217  | -1.18374 | -1.15887 | H         | 1.33664  | -1.87668 | -0.32505 |
| N         | 3.45888  | 0.34632  | -0.22026 | N         | 2.58215  | 0.35555  | -0.18040 |
| C         | 4.14396  | 1.27064  | 0.10528  | C         | 3.24446  | 1.40793  | -0.08837 |
| O         | 4.75338  | 2.22453  | 0.37950  | O         | 4.23257  | 2.03622  | 0.04927  |
| C         | 1.94386  | 4.11719  | 0.36113  | C         | 2.14639  | 3.97017  | 0.18583  |
| H         | 1.00951  | 4.67971  | 0.44529  | H         | 1.43372  | 4.67248  | -0.23890 |
| H         | 2.16356  | 3.68940  | 1.34219  | H         | 2.08346  | 4.00262  | 1.27161  |
| H         | 2.73520  | 4.82415  | 0.12445  | H         | 3.14674  | 4.24962  | -0.12051 |
| O         | 1.89787  | 3.15292  | -0.65042 | O         | 1.88503  | 2.67244  | -0.31093 |
| H         | 1.22684  | 2.49091  | -0.39130 | H         | 1.02570  | 2.31884  | 0.08872  |
| C         | -5.87947 | 0.28986  | 0.58392  | C         | -5.91945 | 0.16016  | -0.46678 |
| C         | -6.09417 | -1.79523 | 0.23406  | C         | -6.22999 | -1.62695 | 0.64070  |
| C         | -4.97045 | -1.41172 | -0.43069 | C         | -4.89653 | -1.57085 | 0.37548  |
| N         | -4.84276 | -0.06839 | -0.20014 | N         | -4.70810 | -0.41814 | -0.33852 |
| H         | -6.01261 | 1.30447  | 0.90995  | H         | -6.04699 | 1.08645  | -0.99511 |
| H         | -6.52881 | -2.77612 | 0.28808  | H         | -6.76675 | -2.38785 | 1.17633  |
| H         | -4.26887 | -1.95126 | -1.03601 | H         | -4.08328 | -2.22709 | 0.61560  |
| N         | -6.65923 | -0.72100 | 0.86847  | N         | -6.86520 | -0.53661 | 0.10823  |
| C         | -3.77542 | 0.79520  | -0.67495 | C         | -3.44288 | 0.10073  | -0.82799 |
| H         | -4.11210 | 1.81910  | -0.54863 | H         | -3.67238 | 0.85484  | -1.57366 |
| H         | -3.64655 | 0.62021  | -1.73922 | H         | -2.91644 | -0.70697 | -1.32812 |
| C         | -2.46456 | 0.57110  | 0.06452  | C         | -2.58373 | 0.69233  | 0.27989  |
| H         | -2.14793 | -0.46387 | -0.06009 | H         | -2.37169 | -0.07311 | 1.02537  |
| H         | -2.61993 | 0.73585  | 1.13025  | H         | -3.13685 | 1.48689  | 0.77927  |
| C         | -1.36757 | 1.49942  | -0.43967 | C         | -1.27441 | 1.24635  | -0.26240 |
| H         | -1.67548 | 2.53542  | -0.31278 | H         | -1.47443 | 2.02022  | -0.99999 |
| H         | -1.21457 | 1.34497  | -1.50591 | H         | -0.71622 | 0.46167  | -0.76781 |
| N         | -0.08008 | 1.33004  | 0.22612  | N         | -0.40107 | 1.82040  | 0.75997  |
| H         | 0.24510  | 0.38025  | 0.10772  | H         | -0.18471 | 1.12195  | 1.45839  |
| H         | -0.19148 | 1.46373  | 1.22199  | H         | -0.87967 | 2.56779  | 1.24462  |

| Cat.2-IM |          |          |          | Cat.2-TS2 |          |          |          |
|----------|----------|----------|----------|-----------|----------|----------|----------|
| O        | -1.93393 | -2.57234 | -0.24999 | O         | -2.19220 | -2.50257 | -0.24160 |
| C        | -2.46525 | -1.34888 | -0.56171 | C         | -2.58997 | -1.23392 | -0.54806 |
| C        | -2.37321 | -3.65764 | -1.03868 | C         | -2.74963 | -3.53411 | -1.03041 |
| H        | -1.85890 | -4.53252 | -0.65730 | H         | -2.33033 | -4.45883 | -0.65134 |
| H        | -3.44613 | -3.80172 | -0.95364 | H         | -3.83115 | -3.56043 | -0.93982 |
| C        | -2.87643 | 3.67805  | 0.26788  | C         | -2.41791 | 3.81268  | 0.28072  |
| C        | -3.43948 | 2.86049  | -0.69991 | C         | -3.00919 | 3.07027  | -0.72970 |
| C        | -2.02812 | 3.10248  | 1.20583  | C         | -1.70561 | 3.14008  | 1.26523  |
| C        | -1.75561 | 1.74801  | 1.17048  | C         | -1.59158 | 1.76263  | 1.23486  |
| C        | -2.31707 | 0.90220  | 0.19685  | C         | -2.18358 | 0.99542  | 0.21751  |
| C        | -3.17307 | 1.49966  | -0.74492 | C         | -2.90103 | 1.68791  | -0.77102 |
| H        | -3.62180 | 0.88695  | -1.50266 | H         | -3.36889 | 1.13362  | -1.56134 |
| H        | -4.10187 | 3.28459  | -1.43983 | H         | -3.56759 | 3.57102  | -1.50627 |
| H        | -1.57456 | 3.71281  | 1.97199  | H         | -1.23552 | 3.69086  | 2.06551  |
| H        | -1.09526 | 1.31730  | 1.90751  | H         | -1.03865 | 1.25906  | 2.01225  |
| N        | -1.96317 | -0.43391 | 0.26283  | N         | -1.98913 | -0.37626 | 0.27809  |
| O        | -3.26917 | -1.26104 | -1.48022 | O         | -3.38306 | -1.04748 | -1.45796 |
| H        | -0.76820 | -2.41809 | 2.33725  | H         | -0.94751 | -2.39660 | 2.27069  |
| H        | -2.12121 | -3.51592 | -2.08542 | H         | -2.48711 | -3.41736 | -2.07738 |
| H        | -3.09133 | 4.73435  | 0.29259  | H         | -2.50922 | 4.88674  | 0.30261  |
| C        | 4.97877  | 0.31898  | 0.23169  | C         | 4.92402  | 0.10988  | 0.24938  |
| C        | 4.54969  | 1.67053  | -1.35160 | C         | 4.57328  | 1.46392  | -1.35095 |
| C        | 3.53571  | 0.76377  | -1.34211 | C         | 3.53010  | 0.59074  | -1.35735 |
| N        | 3.82255  | -0.10227 | -0.32076 | N         | 3.76683  | -0.27723 | -0.32505 |
| H        | 5.42679  | -0.19764 | 1.05980  | H         | 5.33708  | -0.41520 | 1.09027  |
| H        | 4.68415  | 2.50561  | -2.01369 | H         | 4.74920  | 2.28953  | -2.01520 |
| H        | 2.66119  | 0.64983  | -1.95196 | H         | 2.66504  | 0.50153  | -1.98453 |
| N        | 5.45131  | 1.38430  | -0.36066 | N         | 5.44396  | 1.15507  | -0.33936 |
| C        | 3.02353  | -1.23596 | 0.10410  | C         | 2.91875  | -1.37806 | 0.09198  |
| H        | 3.65061  | -1.85179 | 0.74009  | H         | 3.51451  | -2.01964 | 0.73274  |
| H        | 2.76618  | -1.82073 | -0.77396 | H         | 2.64684  | -1.95082 | -0.78963 |
| C        | 1.76508  | -0.81044 | 0.84726  | C         | 1.67152  | -0.90203 | 0.82309  |
| H        | 1.15106  | -0.18809 | 0.20054  | H         | 1.10060  | -0.23918 | 0.17701  |
| H        | 2.04232  | -0.21425 | 1.71502  | H         | 1.96557  | -0.33159 | 1.70279  |
| C        | 0.97129  | -2.02380 | 1.29072  | C         | 0.80831  | -2.07757 | 1.23934  |
| H        | 1.54988  | -2.64773 | 1.96341  | H         | 1.35546  | -2.74715 | 1.89592  |
| H        | 0.65787  | -2.62180 | 0.44315  | H         | 0.47478  | -2.64151 | 0.37515  |
| N        | -0.26338 | -1.60864 | 1.99187  | N         | -0.40539 | -1.60884 | 1.93499  |
| H        | -0.94253 | -1.07032 | 1.32599  | H         | -1.10536 | -1.00173 | 1.22342  |
| H        | -0.04953 | -1.02478 | 2.79460  | H         | -0.16457 | -1.04791 | 2.74512  |
| Cat.2-PC |          |          |          |           |          |          |          |
|          | O        | -1.73600 | -2.63595 | -0.31001  |          |          |          |
|          | C        | -2.35558 | -1.50248 | -0.66322  |          |          |          |
|          | C        | -2.02212 | -3.77402 | -1.11165  |          |          |          |
|          | H        | -1.44673 | -4.58433 | -0.68317  |          |          |          |
|          | H        | -3.07948 | -4.01285 | -1.07949  |          |          |          |
|          | C        | -3.19012 | 3.51231  | 0.25804   |          |          |          |
|          | C        | -3.65322 | 2.68398  | -0.75143  |          |          |          |
|          | C        | -2.34185 | 2.98435  | 1.22152   |          |          |          |
|          | C        | -1.96652 | 1.65433  | 1.17423   |          |          |          |

|           | C        | -2.43271 | 0.81933  | 0.15589   |          |          |          |
|-----------|----------|----------|----------|-----------|----------|----------|----------|
|           | C        | -3.28481 | 1.34772  | -0.81356  |          |          |          |
|           | H        | -3.65180 | 0.71924  | -1.60147  |          |          |          |
|           | H        | -4.31311 | 3.07617  | -1.50934  |          |          |          |
|           | H        | -1.96843 | 3.60909  | 2.01740   |          |          |          |
|           | H        | -1.30810 | 1.25153  | 1.92675   |          |          |          |
|           | N        | -1.99775 | -0.50919 | 0.18110   |          |          |          |
|           | O        | -3.11275 | -1.42888 | -1.60461  |          |          |          |
|           | H        | -0.59796 | -2.16603 | 2.67864   |          |          |          |
|           | H        | -1.72004 | -3.60802 | -2.13992  |          |          |          |
|           | H        | -3.48346 | 4.54881  | 0.29490   |          |          |          |
|           | C        | 4.93797  | 0.67172  | 0.19891   |          |          |          |
|           | C        | 4.43628  | 1.59756  | -1.64700  |          |          |          |
|           | C        | 3.52657  | 0.60287  | -1.46067  |          |          |          |
|           | N        | 3.85996  | 0.01259  | -0.27141  |          |          |          |
|           | H        | 5.40245  | 0.39846  | 1.12795   |          |          |          |
|           | H        | 4.50883  | 2.28221  | -2.47161  |          |          |          |
|           | H        | 2.69676  | 0.26244  | -2.04825  |          |          |          |
|           | N        | 5.31906  | 1.63427  | -0.60043  |          |          |          |
|           | C        | 3.16363  | -1.08557 | 0.37605   |          |          |          |
|           | H        | 3.83345  | -1.49141 | 1.12718   |          |          |          |
|           | H        | 2.99239  | -1.86047 | -0.36551  |          |          |          |
|           | C        | 1.84975  | -0.65304 | 1.00912   |          |          |          |
|           | H        | 1.20386  | -0.21434 | 0.25092   |          |          |          |
|           | H        | 2.04878  | 0.11966  | 1.75136   |          |          |          |
|           | C        | 1.13287  | -1.82052 | 1.66540   |          |          |          |
|           | H        | 1.79875  | -2.29938 | 2.38727   |          |          |          |
|           | H        | 0.88457  | -2.56583 | 0.91372   |          |          |          |
|           | N        | -0.11695 | -1.37434 | 2.27564   |          |          |          |
|           | H        | -1.34722 | -0.77008 | 0.93054   |          |          |          |
|           | H        | 0.08546  | -0.75084 | 3.04497   |          |          |          |
| Cat.3     |          |          |          | Cat.3-RC1 |          |          |          |
| C         | 0.18984  | -1.07612 | 0.00001  | N         | -0.27943 | 0.19014  | -0.31711 |
| C         | 1.49321  | 0.60223  | -0.00000 | H         | -2.11784 | -0.07257 | -0.62252 |
| C         | 0.22767  | 1.10290  | 0.00001  | C         | 0.35057  | 1.37837  | -0.05852 |
| N         | -0.60100 | 0.01461  | -0.00000 | C         | -3.52196 | -0.30229 | 0.67044  |
| H         | -0.22130 | -2.06820 | 0.00001  | H         | -3.32890 | 0.60914  | 1.24246  |
| H         | 2.41981  | 1.14569  | -0.00001 | H         | -3.06413 | -1.13598 | 1.20938  |
| H         | -0.15506 | 2.10460  | 0.00001  | H         | -4.59706 | -0.46514 | 0.65941  |
| N         | 1.46091  | -0.76680 | -0.00001 | C         | 1.67465  | 1.16069  | 0.15881  |
| C         | -2.04721 | 0.03476  | -0.00000 | N         | 1.85732  | -0.18982 | 0.03035  |
| H         | -2.41009 | -0.98563 | -0.00001 | C         | 0.65734  | -0.72312 | -0.25415 |
| H         | -2.41689 | 0.54316  | -0.88452 | H         | 2.48759  | 1.82119  | 0.38753  |
| H         | -2.41689 | 0.54314  | 0.88453  | H         | -0.18350 | 2.30953  | -0.04566 |
|           |          |          |          | H         | 0.52455  | -1.77748 | -0.40527 |
|           |          |          |          | C         | 3.10761  | -0.90394 | 0.17791  |
|           |          |          |          | H         | 2.93056  | -1.95793 | 0.00374  |
|           |          |          |          | H         | 3.49980  | -0.76921 | 1.18043  |
|           |          |          |          | H         | 3.83270  | -0.54048 | -0.54247 |
|           |          |          |          | O         | -3.07980 | -0.21019 | -0.65333 |
| Cat.3-RC2 |          |          |          | Cat.3-TS1 |          |          |          |

|          |          |             |          |           |          |          |          |
|----------|----------|-------------|----------|-----------|----------|----------|----------|
| C        | -1.03944 | 1.84196     | -0.46141 | C         | 1.14407  | 1.71449  | -0.05940 |
| N        | 2.53229  | -0.17292    | 0.26818  | N         | -2.29185 | 0.10343  | -0.07542 |
| H        | 0.94877  | -0.04261    | 1.22636  | H         | -1.16528 | 1.31877  | -0.40855 |
| C        | 2.88494  | 0.68891     | -0.73629 | C         | -2.03636 | -1.07320 | 0.57709  |
| C        | 0.47090  | 1.05301     | 2.74833  | C         | -1.15854 | 3.24176  | 0.11119  |
| H        | 0.80419  | 1.99759     | 2.31745  | H         | -1.43744 | 3.00874  | 1.13568  |
| H        | 1.24744  | 0.69466     | 3.42776  | H         | -2.03667 | 3.55571  | -0.44543 |
| H        | -0.42315 | 1.24712     | 3.33501  | H         | -0.42715 | 4.03927  | 0.10859  |
| C        | -4.81516 | -1.72809    | -0.05620 | C         | 4.63696  | -1.85947 | 0.07730  |
| C        | -5.03679 | -0.78714    | -1.05107 | C         | 4.68327  | -0.52398 | 0.44925  |
| C        | -3.66142 | -1.65652    | 0.71231  | C         | 3.45480  | -2.37908 | -0.43167 |
| C        | -2.72851 | -0.65514    | 0.49738  | C         | 2.33677  | -1.57387 | -0.56563 |
| C        | -2.96205 | 0.28381     | -0.50299 | C         | 2.37661  | -0.23037 | -0.19273 |
| C        | -4.11339 | 0.22010     | -1.27834 | C         | 3.56797  | 0.28880  | 0.31824  |
| H        | -5.92953 | -0.83440    | -1.65340 | H         | 5.59498  | -0.10581 | 0.84615  |
| H        | -3.48346 | -2.38544    | 1.48677  | H         | 3.40129  | -3.41520 | -0.72650 |
| H        | -1.82625 | -0.58917    | 1.08426  | H         | 1.41655  | -1.97170 | -0.96184 |
| N        | -2.05875 | 1.30970     | -0.76010 | N         | 1.19087  | 0.50373  | -0.36560 |
| O        | -0.07032 | 2.47301     | -0.28831 | O         | 1.61378  | 2.71706  | 0.35254  |
| C        | 4.10360  | 0.34498     | -1.23016 | C         | -3.18090 | -1.79885 | 0.66926  |
| N        | 4.50347  | -0.75007    | -0.51240 | N         | -4.15224 | -1.04920 | 0.06080  |
| C        | 3.52733  | -1.01843    | 0.37113  | C         | -3.56951 | 0.07971  | -0.36829 |
| H        | 4.71263  | 0.76413     | -2.00663 | H         | -3.39463 | -2.75680 | 1.10039  |
| H        | 2.24202  | 1.49435     | -1.03502 | H         | -1.05453 | -1.31878 | 0.93284  |
| H        | 3.59320  | -1.83779    | 1.06135  | H         | -4.11426 | 0.84736  | -0.88330 |
| H        | -4.27406 | 0.95646     | -2.04802 | H         | 3.62269  | 1.32315  | 0.61221  |
| C        | 5.74729  | -1.47244    | -0.67436 | C         | -5.54659 | -1.41086 | -0.08800 |
| H        | 5.76102  | -2.30615    | 0.01674  | H         | -6.06042 | -0.61120 | -0.60639 |
| H        | 6.58919  | -0.82120    | -0.46409 | H         | -5.99991 | -1.55449 | 0.88686  |
| H        | 5.83019  | -1.84932    | -1.68815 | H         | -5.63499 | -2.32567 | -0.66398 |
| O        | 0.15030  | 0.10522     | 1.76593  | O         | -0.57595 | 2.11992  | -0.53087 |
| H        | -5.53496 | -2.51107    | 0.11890  | H         | 5.50842  | -2.48532 | 0.18183  |
| Cat.3-IM |          |             |          | Cat.3-TS2 |          |          |          |
| 3-IM.log | Energy:  | 179.7630000 |          | C         | 3.00574  | -2.36284 | -0.38851 |
| C        | -3.07895 | -2.36523    | 0.24474  | C         | 4.24276  | -1.84735 | -0.02402 |
| C        | -4.32887 | -1.79812    | 0.03029  | C         | 4.32514  | -0.50508 | 0.31430  |
| C        | -4.40416 | -0.42830    | -0.17048 | C         | 3.20729  | 0.31583  | 0.29528  |
| C        | -3.26939 | 0.36971     | -0.16234 | C         | 1.94993  | -0.19173 | -0.07055 |
| C        | -1.99669 | -0.18903    | 0.05071  | C         | 1.88518  | -1.55290 | -0.41217 |
| C        | -1.94179 | -1.57945    | 0.25498  | H         | 2.91142  | -3.40305 | -0.66058 |
| H        | -2.98758 | -3.42843    | 0.40754  | H         | 5.11870  | -2.47580 | -0.00641 |
| H        | -5.21810 | -2.40789    | 0.02218  | H         | 5.27612  | -0.08229 | 0.60180  |
| H        | -5.36435 | 0.03635     | -0.33864 | H         | 3.29583  | 1.35276  | 0.55668  |
| H        | -3.35386 | 1.42789     | -0.31714 | H         | 0.93488  | -1.96675 | -0.71102 |
| H        | -0.98106 | -2.03672    | 0.43285  | N         | 0.75818  | 0.51598  | -0.09762 |
| N        | -0.78876 | 0.48689     | 0.06499  | C         | 0.71457  | 1.84561  | -0.03703 |
| C        | -0.71777 | 1.81365     | 0.01263  | O         | 1.60968  | 2.67644  | 0.01901  |
| O        | -1.58926 | 2.67160     | -0.04088 | C         | -0.79893 | 3.65111  | -0.00105 |
| C        | 0.83660  | 3.58742     | -0.01898 | H         | -1.87355 | 3.79285  | -0.01153 |
| H        | 1.91401  | 3.70785     | -0.00624 | H         | -0.38525 | 4.07660  | 0.90807  |
| H        | 0.43372  | 4.02588     | -0.92697 | H         | -0.35813 | 4.15437  | -0.85623 |



|   |         |          |          |   |          |          |          |
|---|---------|----------|----------|---|----------|----------|----------|
| H | 0.40509 | 4.09757  | 0.83705  | O | -0.58815 | 2.25562  | -0.05958 |
| O | 0.59674 | 2.19722  | 0.03392  | H | -0.55973 | -0.15740 | -0.02305 |
| H | 0.63834 | -0.22889 | 0.00050  | N | -1.58356 | -0.63892 | 0.05577  |
| N | 1.63201 | -0.66942 | -0.05153 | C | -1.86022 | -1.93586 | 0.39579  |
| C | 1.93687 | -1.97706 | -0.31843 | C | -3.20428 | -2.09114 | 0.36501  |
| C | 3.28379 | -2.09415 | -0.27686 | N | -3.73134 | -0.87546 | 0.00365  |
| N | 3.77963 | -0.84670 | 0.01695  | C | -2.72512 | -0.02553 | -0.17316 |
| C | 2.75617 | -0.01232 | 0.14555  | H | -3.82868 | -2.93852 | 0.56433  |
| H | 3.92982 | -2.93512 | -0.42768 | H | -1.08608 | -2.63767 | 0.63134  |
| H | 1.17914 | -2.70788 | -0.51502 | H | -2.83361 | 1.00183  | -0.45378 |
| H | 2.83453 | 1.03079  | 0.37113  | C | -5.14394 | -0.57935 | -0.15683 |
| C | 5.18462 | -0.50566 | 0.16065  | H | -5.25414 | 0.46627  | -0.41296 |
| H | 5.26565 | 0.55321  | 0.36840  | H | -5.66451 | -0.78233 | 0.77177  |
| H | 5.70861 | -0.73750 | -0.75908 | H | -5.55715 | -1.19315 | -0.94879 |
| H | 5.61347 | -1.07176 | 0.97912  |   |          |          |          |

Cat.3-PC

|   |          |          |          |
|---|----------|----------|----------|
| C | -2.92047 | -2.50280 | 0.19813  |
| C | -4.22296 | -2.03002 | 0.11830  |
| C | -4.43354 | -0.66695 | -0.01420 |
| C | -3.37141 | 0.22392  | -0.06955 |
| C | -2.06394 | -0.25368 | 0.01263  |
| C | -1.85128 | -1.62712 | 0.14778  |
| H | -2.73162 | -3.55943 | 0.30292  |
| H | -5.05664 | -2.71202 | 0.15907  |
| H | -5.43885 | -0.28123 | -0.07868 |
| H | -3.54988 | 1.27653  | -0.17272 |
| H | -0.84254 | -2.00103 | 0.21811  |
| N | -0.92743 | 0.55977  | -0.04364 |
| C | -0.88845 | 1.91132  | -0.02921 |
| O | -1.82965 | 2.67029  | 0.01611  |
| C | 0.57849  | 3.73331  | -0.06940 |
| H | 1.64950  | 3.88004  | -0.11980 |
| H | 0.10070  | 4.19009  | -0.92897 |
| H | 0.18621  | 4.17484  | 0.84011  |
| O | 0.38408  | 2.32505  | -0.07225 |
| H | -0.02500 | 0.08561  | -0.07803 |
| N | 1.75197  | -0.75680 | -0.15134 |
| C | 2.23736  | -2.00460 | -0.44012 |
| C | 3.58943  | -2.01961 | -0.29655 |
| N | 3.93799  | -0.75325 | 0.08864  |
| C | 2.80183  | -0.03862 | 0.15974  |
| H | 4.32139  | -2.79183 | -0.42895 |
| H | 1.58985  | -2.80960 | -0.73244 |
| H | 2.79217  | 0.99746  | 0.43864  |
| C | 5.27691  | -0.27653 | 0.36191  |
| H | 5.22318  | 0.76538  | 0.65228  |
| H | 5.89596  | -0.36813 | -0.52431 |
| H | 5.72058  | -0.84912 | 1.16952  |

|       |           |
|-------|-----------|
| Cat.4 | Cat.4-RC1 |
|-------|-----------|

|           |          |          |          |           |          |          |          |
|-----------|----------|----------|----------|-----------|----------|----------|----------|
| C         | -0.43998 | -1.25039 | -0.22853 | O         | -2.80703 | -1.01802 | -0.81181 |
| H         | -0.40630 | -1.30418 | -1.31818 | N         | -0.86691 | 0.89901  | -0.01374 |
| H         | 0.04152  | -2.14788 | 0.14774  | C         | -1.17789 | 2.02889  | -0.87146 |
| C         | -0.43998 | 1.25039  | -0.22853 | H         | -0.55350 | 2.90525  | -0.67592 |
| H         | 0.04152  | 2.14788  | 0.14775  | H         | -2.21456 | 2.31953  | -0.71929 |
| H         | -0.40630 | 1.30418  | -1.31818 | H         | -1.05471 | 1.74602  | -1.91332 |
| C         | -1.89245 | 1.24762  | 0.24116  | C         | -1.09593 | 1.24239  | 1.38004  |
| H         | -2.39074 | 2.14472  | -0.12332 | H         | -2.14434 | 1.49717  | 1.51360  |
| H         | -1.91732 | 1.29960  | 1.33110  | H         | -0.50118 | 2.09710  | 1.71332  |
| C         | -1.89245 | -1.24762 | 0.24115  | H         | -0.87261 | 0.39891  | 2.02426  |
| H         | -2.39074 | -2.14471 | -0.12332 | C         | 0.44877  | 0.30612  | -0.30360 |
| H         | -1.91732 | -1.29960 | 1.33110  | C         | 1.65450  | 1.13515  | 0.15059  |
| N         | 1.69643  | -0.00000 | -0.31887 | H         | 0.49188  | 0.23629  | -1.39086 |
| C         | 0.32713  | -0.00000 | 0.21356  | H         | 1.64615  | 1.22467  | 1.23710  |
| H         | 0.36591  | -0.00000 | 1.31432  | H         | 1.59380  | 2.14473  | -0.25201 |
| C         | -2.63497 | 0.00000  | -0.21478 | C         | -3.61605 | -1.31068 | 0.29253  |
| H         | -2.71054 | 0.00000  | -1.30360 | H         | -4.20115 | -0.44921 | 0.62479  |
| C         | 2.44553  | 1.18150  | 0.06984  | H         | -4.31509 | -2.09200 | 0.00318  |
| H         | 3.46541  | 1.09196  | -0.29353 | H         | -2.14092 | -0.36020 | -0.53169 |
| H         | 2.02487  | 2.07899  | -0.36856 | H         | -3.04408 | -1.67772 | 1.14795  |
| H         | 2.48880  | 1.32072  | 1.15817  | C         | 0.54941  | -1.12066 | 0.23423  |
| C         | 2.44554  | -1.18149 | 0.06984  | H         | 0.50137  | -1.11228 | 1.32320  |
| H         | 2.48880  | -1.32071 | 1.15818  | H         | -0.30397 | -1.69448 | -0.12077 |
| H         | 2.02487  | -2.07899 | -0.36855 | C         | 2.96396  | 0.47888  | -0.28371 |
| H         | 3.46541  | -1.09196 | -0.29352 | H         | 3.01988  | 0.47517  | -1.37370 |
| H         | -3.65315 | 0.00000  | 0.17220  | H         | 3.80884  | 1.06840  | 0.06943  |
| Cat.4-RC2 |          |          |          | C         | 1.85772  | -1.78001 | -0.19656 |
| O         | -0.46420 | 2.10474  | -1.33917 | H         | 1.86342  | -1.89164 | -1.28218 |
| C         | 2.22824  | 1.95693  | 0.05665  | H         | 1.92034  | -2.78416 | 0.22017  |
| N         | -1.89566 | 0.91023  | 0.81122  | C         | 3.06750  | -0.95384 | 0.22883  |
| C         | -0.88403 | 0.78485  | 1.84603  | H         | 3.12766  | -0.94088 | 1.31856  |
| H         | -1.27777 | 0.39850  | 2.79028  | H         | 3.98545  | -1.41714 | -0.13047 |
| H         | -0.45015 | 1.76231  | 2.04331  | Cat.4-TS1 |          |          |          |
| H         | -0.09175 | 0.12317  | 1.50853  | O         | -0.07058 | 2.27551  | -0.73025 |
| C         | -2.94211 | 1.82516  | 1.23679  | C         | 1.66979  | 1.71606  | -0.47924 |
| H         | -2.50144 | 2.80014  | 1.42928  | N         | -1.88861 | 1.03859  | 0.80544  |
| H         | -3.44655 | 1.50198  | 2.15137  | C         | -1.29036 | 1.04463  | 2.13500  |
| H         | -3.68833 | 1.94438  | 0.45882  | H         | -1.96801 | 0.67335  | 2.90560  |
| C         | -2.36710 | -0.39146 | 0.31174  | H         | -1.01192 | 2.06227  | 2.39617  |
| C         | -3.25040 | -1.18537 | 1.27993  | H         | -0.39338 | 0.43346  | 2.13569  |
| H         | -1.45955 | -0.97303 | 0.14680  | C         | -3.06809 | 1.89651  | 0.78180  |
| H         | -4.17277 | -0.63447 | 1.46525  | H         | -2.77392 | 2.90583  | 1.05486  |
| H         | -2.75132 | -1.30230 | 2.24023  | H         | -3.83777 | 1.57035  | 1.48293  |
| C         | -0.85016 | 3.44866  | -1.42166 | H         | -3.49641 | 1.92764  | -0.21373 |
| H         | -0.60593 | 4.01052  | -0.51838 | C         | -2.11026 | -0.33017 | 0.29285  |
|           |          |          |          | C         | -3.21788 | -1.11607 | 0.99985  |
|           |          |          |          | H         | -1.17029 | -0.84886 | 0.47608  |
|           |          |          |          | H         | -4.17710 | -0.62532 | 0.83542  |
|           |          |          |          | H         | -3.04742 | -1.13104 | 2.07435  |
|           |          |          |          | C         | -0.30281 | 3.67050  | -0.64832 |
|           |          |          |          | H         | -0.27016 | 4.02170  | 0.37998  |

|          |          |          |          |           |          |          |          |
|----------|----------|----------|----------|-----------|----------|----------|----------|
| H        | -0.31296 | 3.90456  | -2.24994 | H         | 0.47189  | 4.16789  | -1.21766 |
| C        | 5.04380  | -2.35559 | 0.00304  | C         | 4.66014  | -2.18966 | 0.39601  |
| C        | 5.41900  | -1.09516 | 0.44747  | C         | 4.94327  | -0.84197 | 0.23023  |
| C        | 3.76902  | -2.55162 | -0.50703 | C         | 3.34070  | -2.61570 | 0.33510  |
| C        | 2.87171  | -1.49809 | -0.57462 | C         | 2.32088  | -1.70651 | 0.11195  |
| C        | 3.25275  | -0.23943 | -0.12752 | C         | 2.59902  | -0.35030 | -0.05646 |
| C        | 4.53060  | -0.03514 | 0.38515  | C         | 3.92773  | 0.07451  | 0.00579  |
| H        | 4.81847  | 0.94512  | 0.72916  | H         | 4.16698  | 1.11659  | -0.12096 |
| H        | 6.40794  | -0.93342 | 0.84508  | H         | 5.96378  | -0.49546 | 0.27525  |
| H        | 3.46875  | -3.52679 | -0.85474 | H         | 3.10245  | -3.66000 | 0.46158  |
| H        | 1.87943  | -1.63895 | -0.96970 | H         | 1.29523  | -2.03451 | 0.06196  |
| N        | 2.32281  | 0.79600  | -0.21056 | N         | 1.49775  | 0.49580  | -0.27789 |
| O        | 2.05124  | 3.08433  | 0.29182  | O         | 2.33415  | 2.68314  | -0.60764 |
| H        | -0.95620 | 1.69337  | -0.60171 | H         | -0.73216 | 1.76175  | -0.15824 |
| H        | -1.91935 | 3.56446  | -1.61512 | H         | -1.27024 | 3.90048  | -1.08473 |
| H        | 5.73974  | -3.17699 | 0.05417  | H         | 5.45510  | -2.89671 | 0.56965  |
| C        | -3.05702 | -0.25403 | -1.04512 | C         | -2.33556 | -0.33455 | -1.21837 |
| H        | -3.97518 | 0.32381  | -0.93891 | H         | -3.26395 | 0.18315  | -1.45850 |
| H        | -2.40745 | 0.29780  | -1.72120 | H         | -1.52987 | 0.20846  | -1.70747 |
| C        | -3.59667 | -2.55702 | 0.70330  | C         | -3.29317 | -2.54587 | 0.46700  |
| H        | -2.68344 | -3.14710 | 0.60816  | H         | -2.36902 | -3.07080 | 0.71483  |
| H        | -4.24508 | -3.09587 | 1.39270  | H         | -4.09955 | -3.08249 | 0.96455  |
| C        | -3.40217 | -1.62310 | -1.62621 | C         | -2.41430 | -1.76189 | -1.75577 |
| H        | -2.47989 | -2.16845 | -1.83385 | H         | -1.44912 | -2.25183 | -1.61730 |
| H        | -3.91399 | -1.50170 | -2.57973 | H         | -2.60207 | -1.74062 | -2.82808 |
| C        | -4.26145 | -2.43780 | -0.66439 | C         | -3.49474 | -2.56966 | -1.04441 |
| H        | -5.23154 | -1.95073 | -0.55012 | H         | -4.47304 | -2.14799 | -1.28200 |
| H        | -4.45427 | -3.42732 | -1.07682 | H         | -3.49871 | -3.59626 | -1.40801 |
| Cat.4-IM |          |          |          | Cat.4-TS2 |          |          |          |
| O        | 0.54341  | 2.59031  | -0.08608 | O         | 0.46465  | 2.62406  | -0.01808 |
| C        | 1.63576  | 1.79487  | -0.30361 | C         | 1.53033  | 1.82642  | -0.28599 |
| N        | -1.12340 | 0.15560  | 1.25026  | N         | -0.97779 | 0.00023  | 1.23932  |
| C        | -0.72427 | -0.74877 | 2.35188  | C         | -0.53391 | -1.01021 | 2.21355  |
| H        | -1.55091 | -0.89058 | 3.03586  | H         | -1.31450 | -1.22964 | 2.93442  |
| H        | 0.10656  | -0.29243 | 2.87602  | H         | 0.33115  | -0.62110 | 2.73983  |
| H        | -0.41490 | -1.69927 | 1.93754  | H         | -0.25438 | -1.91811 | 1.69326  |
| C        | -1.59689 | 1.44175  | 1.80674  | C         | -1.41448 | 1.20812  | 1.95696  |
| H        | -0.79003 | 1.86923  | 2.38761  | H         | -0.56721 | 1.59611  | 2.51056  |
| H        | -2.45370 | 1.26715  | 2.44491  | H         | -2.21454 | 0.97252  | 2.65161  |
| H        | -1.85184 | 2.11905  | 1.00648  | H         | -1.74179 | 1.96223  | 1.25695  |
| C        | -2.06097 | -0.50402 | 0.27358  | C         | -1.97201 | -0.54641 | 0.26826  |
| C        | -3.42325 | -0.83620 | 0.86806  | C         | -3.30994 | -0.93167 | 0.89473  |
| H        | -1.55613 | -1.43321 | 0.02113  | H         | -1.50284 | -1.45185 | -0.11149 |
| H        | -3.93973 | 0.08257  | 1.14139  | H         | -3.80001 | -0.04167 | 1.28763  |
| H        | -3.31739 | -1.43217 | 1.77066  | H         | -3.16267 | -1.61390 | 1.72835  |
| C        | 0.71134  | 3.96318  | -0.36097 | C         | 0.62760  | 3.99590  | -0.31659 |
| H        | 1.49723  | 4.39926  | 0.24882  | H         | 1.44619  | 4.42903  | 0.24972  |
| H        | 0.94709  | 4.13454  | -1.40729 | H         | 0.81126  | 4.15069  | -1.37526 |
| C        | 4.03474  | -2.69304 | -0.22783 | C         | 3.99245  | -2.60658 | -0.36175 |
| C        | 4.52523  | -1.39641 | -0.17949 | C         | 4.44890  | -1.33314 | -0.05142 |
| C        | 2.65828  | -2.87875 | -0.21861 | C         | 2.63242  | -2.79796 | -0.55700 |

|          |          |          |          |          |          |          |          |
|----------|----------|----------|----------|----------|----------|----------|----------|
| C        | 1.80224  | -1.79393 | -0.16293 | C        | 1.75027  | -1.73557 | -0.44789 |
| C        | 2.27832  | -0.47208 | -0.11326 | C        | 2.19588  | -0.44702 | -0.13175 |
| C        | 3.67441  | -0.30272 | -0.12424 | C        | 3.57116  | -0.26740 | 0.06639  |
| H        | 4.07869  | 0.69107  | -0.09541 | H        | 3.94415  | 0.71133  | 0.30537  |
| H        | 5.59171  | -1.22670 | -0.18346 | H        | 5.50300  | -1.16410 | 0.10767  |
| H        | 2.24667  | -3.87592 | -0.25859 | H        | 2.25305  | -3.77755 | -0.80384 |
| H        | 0.73504  | -1.95237 | -0.16430 | H        | 0.69710  | -1.89301 | -0.61847 |
| N        | 1.33100  | 0.53371  | -0.01283 | N        | 1.24070  | 0.55836  | 0.02300  |
| O        | 2.66935  | 2.30261  | -0.72272 | O        | 2.55073  | 2.29914  | -0.76018 |
| H        | -0.22318 | 0.34321  | 0.71194  | H        | 0.03560  | 0.28367  | 0.61513  |
| H        | -0.23523 | 4.43554  | -0.12259 | H        | -0.30333 | 4.47420  | -0.03529 |
| H        | 4.70550  | -3.53612 | -0.27273 | H        | 4.68196  | -3.43072 | -0.45063 |
| C        | -2.19818 | 0.31935  | -1.00205 | C        | -2.17948 | 0.39607  | -0.91443 |
| H        | -2.69381 | 1.26387  | -0.78583 | H        | -2.64954 | 1.31872  | -0.57737 |
| H        | -1.21389 | 0.55023  | -1.40055 | H        | -1.21938 | 0.66292  | -1.34759 |
| C        | -4.26218 | -1.59854 | -0.15797 | C        | -4.21534 | -1.58363 | -0.14989 |
| H        | -3.79438 | -2.56392 | -0.35487 | H        | -3.77045 | -2.52727 | -0.46912 |
| H        | -5.24399 | -1.80554 | 0.26289  | H        | -5.17480 | -1.82747 | 0.30253  |
| C        | -3.02899 | -0.44973 | -2.02752 | C        | -3.07635 | -0.26082 | -1.96185 |
| H        | -2.49461 | -1.35488 | -2.31840 | H        | -2.57006 | -1.13572 | -2.37226 |
| H        | -3.14014 | 0.15252  | -2.92689 | H        | -3.23183 | 0.42797  | -2.79018 |
| C        | -4.39628 | -0.82535 | -1.46584 | C        | -4.41449 | -0.68372 | -1.36493 |
| H        | -4.97344 | 0.08340  | -1.28853 | H        | -4.97033 | 0.20623  | -1.06539 |
| H        | -4.95219 | -1.41477 | -2.19298 | H        | -5.01727 | -1.19354 | -2.11483 |
| Cat.4-PC |          |          |          |          |          |          |          |
|          | O        | 0.94348  | 2.67965  | -0.13614 |          |          |          |
|          | C        | 1.94078  | 1.80759  | -0.31586 |          |          |          |
|          | N        | -1.24227 | 0.30215  | 1.22811  |          |          |          |
|          | C        | -0.94215 | -0.45833 | 2.42862  |          |          |          |
|          | H        | -1.78489 | -0.51990 | 3.12342  |          |          |          |
|          | H        | -0.11516 | 0.01361  | 2.95440  |          |          |          |
|          | H        | -0.64313 | -1.46849 | 2.16473  |          |          |          |
|          | C        | -1.62918 | 1.65684  | 1.58532  |          |          |          |
|          | H        | -0.80199 | 2.13497  | 2.10218  |          |          |          |
|          | H        | -2.50118 | 1.69023  | 2.24466  |          |          |          |
|          | H        | -1.84432 | 2.24175  | 0.69891  |          |          |          |
|          | C        | -2.17930 | -0.39417 | 0.33323  |          |          |          |
|          | C        | -3.62402 | -0.48688 | 0.83770  |          |          |          |
|          | H        | -1.79568 | -1.41248 | 0.26029  |          |          |          |
|          | H        | -4.04650 | 0.51497  | 0.91720  |          |          |          |
|          | H        | -3.65018 | -0.92275 | 1.83473  |          |          |          |
|          | C        | 1.22813  | 4.02909  | -0.47909 |          |          |          |
|          | H        | 2.04993  | 4.41318  | 0.11511  |          |          |          |
|          | H        | 1.47114  | 4.11637  | -1.53238 |          |          |          |
|          | C        | 3.67097  | -3.04094 | -0.12941 |          |          |          |
|          | C        | 4.35532  | -1.83754 | -0.19433 |          |          |          |
|          | C        | 2.28848  | -3.02137 | -0.01340 |          |          |          |
|          | C        | 1.60454  | -1.81939 | 0.03115  |          |          |          |
|          | C        | 2.29368  | -0.60772 | -0.03119 |          |          |          |
|          | C        | 3.68338  | -0.62525 | -0.14281 |          |          |          |
|          | H        | 4.22716  | 0.29811  | -0.19303 |          |          |          |

|   |          |          |          |
|---|----------|----------|----------|
| H | 5.43039  | -1.83319 | -0.28200 |
| H | 1.73435  | -3.94519 | 0.03667  |
| H | 0.52992  | -1.81317 | 0.11041  |
| N | 1.53697  | 0.56846  | 0.05032  |
| O | 3.02685  | 2.12209  | -0.74648 |
| H | 0.56757  | 0.48017  | 0.36618  |
| H | 0.32355  | 4.58174  | -0.26107 |
| H | 4.20401  | -3.97695 | -0.16866 |
| C | -2.15015 | 0.19085  | -1.07823 |
| H | -2.52266 | 1.21487  | -1.06488 |
| H | -1.12158 | 0.23133  | -1.43230 |
| C | -4.48501 | -1.31526 | -0.11407 |
| H | -4.12257 | -2.34473 | -0.12278 |
| H | -5.51117 | -1.34967 | 0.24919  |
| C | -3.00943 | -0.63349 | -2.03463 |
| H | -2.57828 | -1.63081 | -2.13626 |
| H | -2.99310 | -0.18406 | -3.02641 |
| C | -4.44458 | -0.75694 | -1.53286 |
| H | -4.91454 | 0.22813  | -1.54351 |
| H | -5.02543 | -1.38864 | -2.20367 |

| Cat.5     |          |          |          | Cat.5-RC1 |          |          |          |
|-----------|----------|----------|----------|-----------|----------|----------|----------|
| C         | -0.73478 | -1.19048 | 0.18670  | O         | -2.10929 | 1.25630  | -0.90463 |
| H         | -0.82863 | -1.25941 | 1.27898  | N         | -0.63449 | -0.99379 | 0.04943  |
| H         | -1.21713 | -2.06726 | -0.23943 | C         | 0.34897  | -1.30848 | -0.97859 |
| C         | -0.73478 | 1.19048  | 0.18670  | H         | 0.89556  | -2.22343 | -0.72305 |
| H         | -1.21713 | 2.06726  | -0.23943 | H         | -0.17214 | -1.48291 | -1.91648 |
| H         | -0.82863 | 1.25941  | 1.27898  | C         | 0.03331  | -0.69673 | 1.30955  |
| C         | 0.73478  | 1.19048  | -0.18670 | H         | 0.56248  | -1.58090 | 1.68312  |
| H         | 1.21713  | 2.06726  | 0.23943  | H         | -0.71790 | -0.42281 | 2.04583  |
| H         | 0.82863  | 1.25941  | -1.27898 | C         | -2.73738 | 1.85908  | 0.19118  |
| C         | 0.73478  | -1.19048 | -0.18670 | H         | -2.02659 | 2.23981  | 0.92896  |
| H         | 1.21713  | -2.06726 | 0.23943  | H         | -3.31775 | 2.70349  | -0.17339 |
| H         | 0.82863  | -1.25941 | -1.27898 | H         | -1.59430 | 0.49652  | -0.57440 |
| C         | -2.80349 | 0.00000  | -0.01784 | H         | -3.42413 | 1.18246  | 0.70634  |
| H         | -3.27403 | 0.88094  | -0.44809 | C         | 1.01739  | 0.44325  | 1.13590  |
| H         | -3.27403 | -0.88094 | -0.44809 | H         | 1.53437  | 0.61794  | 2.07647  |
| H         | -3.00683 | -0.00000 | 1.06071  | H         | 0.46733  | 1.36026  | 0.88554  |
| C         | 2.80349  | 0.00000  | 0.01784  | C         | -1.60880 | -2.05628 | 0.19878  |
| H         | 3.27403  | -0.88094 | 0.44809  | H         | -2.34652 | -1.77468 | 0.94535  |
| H         | 3.00683  | -0.00000 | -1.06071 | H         | -2.12063 | -2.21867 | -0.74596 |
| H         | 3.27403  | 0.88094  | 0.44809  | H         | -1.14952 | -3.00084 | 0.50868  |
| N         | 1.39117  | 0.00000  | 0.32225  | C         | 1.32912  | -0.16399 | -1.14413 |
| N         | -1.39117 | 0.00000  | -0.32225 | H         | 0.79302  | 0.71743  | -1.51966 |
|           |          |          |          | H         | 2.07620  | -0.43518 | -1.88620 |
|           |          |          |          | N         | 1.99621  | 0.12276  | 0.11295  |
|           |          |          |          | C         | 2.97541  | 1.17534  | -0.03400 |
|           |          |          |          | H         | 3.48529  | 1.33971  | 0.91224  |
|           |          |          |          | H         | 3.71765  | 0.88761  | -0.77471 |
|           |          |          |          | H         | 2.53181  | 2.12786  | -0.35049 |
| Cat.5-RC2 |          |          |          | Cat.5-TS1 |          |          |          |

|          |          |          |          |           |          |          |          |
|----------|----------|----------|----------|-----------|----------|----------|----------|
| O        | 1.27029  | 2.18189  | 0.72025  | O         | -0.56093 | 1.91690  | -0.60492 |
| C        | -1.29636 | 1.84775  | -0.91619 | C         | 1.08381  | 1.64586  | 0.16474  |
| N        | 2.78945  | -0.20784 | 1.08311  | N         | -1.93370 | -0.31843 | -1.23711 |
| C        | 1.91444  | -1.36718 | 1.19415  | C         | -1.50546 | -1.49687 | -0.48564 |
| H        | 2.47759  | -2.24405 | 1.53367  | H         | -1.93252 | -2.40082 | -0.93024 |
| H        | 1.14919  | -1.15592 | 1.93684  | H         | -0.42417 | -1.56769 | -0.54410 |
| C        | 3.79057  | -0.42991 | 0.04842  | C         | -3.38185 | -0.15223 | -1.12330 |
| H        | 4.45335  | -1.25777 | 0.32524  | H         | -3.89269 | -0.99074 | -1.60608 |
| H        | 4.39878  | 0.46607  | -0.04548 | H         | -3.66798 | 0.75762  | -1.64384 |
| C        | 2.06909  | 3.08563  | 0.00988  | C         | -1.37930 | 2.90418  | -0.00171 |
| H        | 2.27821  | 2.75378  | -1.00931 | H         | -1.70662 | 2.60354  | 0.98966  |
| H        | 1.53628  | 4.03069  | -0.05368 | H         | -0.79704 | 3.81314  | 0.07541  |
| C        | -5.14930 | -1.18993 | 0.65560  | C         | 5.12992  | -1.28041 | 0.34061  |
| C        | -5.11963 | -0.34976 | -0.44899 | C         | 4.80509  | -0.12809 | 1.04100  |
| C        | -4.04010 | -1.27266 | 1.48419  | C         | 4.22680  | -1.78683 | -0.58354 |
| C        | -2.90637 | -0.52343 | 1.21411  | C         | 3.01740  | -1.14974 | -0.80260 |
| C        | -2.88246 | 0.31499  | 0.10690  | C         | 2.68442  | 0.00907  | -0.10125 |
| C        | -3.99210 | 0.40343  | -0.72872 | C         | 3.59623  | 0.51572  | 0.82725  |
| H        | -3.96591 | 1.05681  | -1.58577 | H         | 3.36168  | 1.40921  | 1.38034  |
| H        | -5.97714 | -0.27864 | -1.09849 | H         | 5.49675  | 0.27798  | 1.76233  |
| H        | -4.05394 | -1.92187 | 2.34464  | H         | 4.46347  | -2.68133 | -1.13782 |
| H        | -2.03995 | -0.57911 | 1.85194  | H         | 2.31555  | -1.53904 | -1.52222 |
| N        | -1.72417 | 1.05292  | -0.13288 | N         | 1.43398  | 0.58292  | -0.39051 |
| O        | -0.80335 | 2.62085  | -1.63480 | O         | 1.24938  | 2.55936  | 0.89456  |
| H        | 1.75467  | 1.33768  | 0.78324  | H         | -1.06760 | 1.05699  | -0.75539 |
| H        | 3.02522  | 3.27495  | 0.50484  | H         | -2.24279 | 3.08575  | -0.63449 |
| H        | -6.02992 | -1.77380 | 0.86818  | H         | 6.07193  | -1.77575 | 0.51186  |
| C        | 3.12802  | -0.73952 | -1.27936 | C         | -3.80973 | -0.07145 | 0.32875  |
| H        | 3.89418  | -0.94306 | -2.02371 | H         | -4.89426 | -0.00670 | 0.37391  |
| H        | 2.56536  | 0.14141  | -1.61726 | H         | -3.40808 | 0.84532  | 0.77960  |
| C        | 3.40238  | 0.11722  | 2.35605  | C         | -1.52971 | -0.41125 | -2.63181 |
| H        | 4.02296  | 1.00273  | 2.24868  | H         | -1.83988 | 0.48558  | -3.16058 |
| H        | 2.62997  | 0.32625  | 3.09124  | H         | -0.44865 | -0.49196 | -2.69261 |
| H        | 4.02830  | -0.69706 | 2.73570  | H         | -1.97417 | -1.27836 | -3.12670 |
| C        | 1.26047  | -1.67368 | -0.13859 | C         | -1.93642 | -1.39389 | 0.96307  |
| H        | 0.59372  | -0.84555 | -0.41229 | H         | -1.41603 | -0.55016 | 1.43680  |
| H        | 0.64897  | -2.56759 | -0.04106 | H         | -1.63723 | -2.29735 | 1.48875  |
| N        | 2.26485  | -1.90017 | -1.16164 | N         | -3.37691 | -1.24851 | 1.05844  |
| C        | 1.66267  | -2.24427 | -2.42952 | C         | -3.81867 | -1.21199 | 2.43410  |
| H        | 2.43857  | -2.44953 | -3.16318 | H         | -4.90342 | -1.14708 | 2.47142  |
| H        | 1.05441  | -3.13867 | -2.31836 | H         | -3.51445 | -2.12322 | 2.94326  |
| H        | 1.02269  | -1.44619 | -2.82691 | H         | -3.40829 | -0.35940 | 2.98985  |
| Cat.5-IM |          |          |          | Cat.5-TS2 |          |          |          |
| O        | 0.22532  | 2.67596  | -0.08340 | O         | 0.36705  | 2.69428  | -0.11176 |
| C        | -0.95558 | 2.00294  | -0.26567 | C         | -0.81441 | 2.04143  | -0.28806 |
| N        | 1.73919  | 0.19950  | 1.06372  | N         | 1.58702  | 0.07860  | 1.12757  |
| C        | 1.92590  | -1.23450 | 1.40568  | C         | 1.66281  | -1.37526 | 1.37864  |
| H        | 2.91936  | -1.33477 | 1.83108  | H         | 2.60450  | -1.58382 | 1.88251  |
| H        | 1.18968  | -1.49276 | 2.15723  | H         | 0.84856  | -1.64716 | 2.04001  |
| C        | 2.66176  | 0.58937  | -0.03497 | C         | 2.63829  | 0.47466  | 0.16712  |
| H        | 3.67246  | 0.52442  | 0.35513  | H         | 3.60657  | 0.31187  | 0.63633  |

|          |          |          |          |          |          |          |          |
|----------|----------|----------|----------|----------|----------|----------|----------|
| H        | 2.43501  | 1.61384  | -0.29702 | H        | 2.51470  | 1.52950  | -0.04061 |
| C        | 0.26833  | 3.99668  | -0.57985 | C        | 0.41707  | 4.02423  | -0.59002 |
| H        | 0.10208  | 4.02412  | -1.65263 | H        | 1.41836  | 4.37959  | -0.37691 |
| H        | -0.47140 | 4.62733  | -0.09584 | H        | 0.23441  | 4.06616  | -1.65914 |
| C        | -3.90443 | -2.12637 | 0.10766  | C        | -3.88355 | -1.97812 | 0.04074  |
| C        | -3.94815 | -1.05088 | -0.76745 | C        | -3.71828 | -1.06121 | -0.98819 |
| C        | -2.85925 | -2.19343 | 1.01950  | C        | -3.00984 | -1.93753 | 1.11736  |
| C        | -1.88811 | -1.20871 | 1.05002  | C        | -1.99459 | -0.99589 | 1.16345  |
| C        | -1.91207 | -0.11267 | 0.17042  | C        | -1.81390 | -0.06781 | 0.13167  |
| C        | -2.97893 | -0.05950 | -0.74409 | C        | -2.70037 | -0.12192 | -0.95188 |
| H        | -3.03895 | 0.76558  | -1.42777 | H        | -2.58908 | 0.58104  | -1.75684 |
| H        | -4.75061 | -0.97770 | -1.48637 | H        | -4.38615 | -1.07871 | -1.83590 |
| H        | -2.80034 | -3.01603 | 1.71603  | H        | -3.12084 | -2.63648 | 1.93196  |
| H        | -1.08799 | -1.26685 | 1.77104  | H        | -1.33492 | -0.95902 | 2.01554  |
| N        | -0.85943 | 0.78483  | 0.25745  | N        | -0.73242 | 0.80880  | 0.21926  |
| O        | -1.88200 | 2.57365  | -0.82817 | O        | -1.75320 | 2.60641  | -0.82527 |
| H        | 0.73571  | 0.35413  | 0.73119  | H        | 0.49986  | 0.37897  | 0.68204  |
| H        | 1.26214  | 4.36873  | -0.35745 | H        | -0.30854 | 4.65274  | -0.08342 |
| H        | -4.66430 | -2.89097 | 0.08144  | H        | -4.67738 | -2.70687 | 0.00445  |
| C        | 2.48576  | -0.32636 | -1.22710 | C        | 2.53134  | -0.33329 | -1.10901 |
| H        | 3.20730  | -0.03472 | -1.98514 | H        | 3.34433  | -0.04174 | -1.76870 |
| H        | 1.48475  | -0.18532 | -1.65284 | H        | 1.59096  | -0.09061 | -1.61943 |
| C        | 1.90845  | 1.06232  | 2.24797  | C        | 1.69529  | 0.83889  | 2.37729  |
| H        | 1.71563  | 2.08586  | 1.95580  | H        | 1.59797  | 1.89423  | 2.15282  |
| H        | 1.19541  | 0.75548  | 3.00372  | H        | 0.89379  | 0.53842  | 3.04324  |
| H        | 2.91869  | 0.95913  | 2.62668  | H        | 2.65295  | 0.65016  | 2.85467  |
| C        | 1.77859  | -2.10712 | 0.17770  | C        | 1.57931  | -2.15576 | 0.08326  |
| H        | 0.74361  | -2.06802 | -0.18183 | H        | 0.58725  | -2.02284 | -0.36518 |
| H        | 1.98259  | -3.13342 | 0.47044  | H        | 1.69218  | -3.21198 | 0.31343  |
| N        | 2.71839  | -1.70826 | -0.85262 | N        | 2.63336  | -1.75333 | -0.82914 |
| C        | 2.64973  | -2.58751 | -1.99968 | C        | 2.60702  | -2.53611 | -2.04498 |
| H        | 3.39095  | -2.28714 | -2.73563 | H        | 3.42941  | -2.23885 | -2.69076 |
| H        | 2.86695  | -3.60726 | -1.69273 | H        | 2.72497  | -3.59000 | -1.80600 |
| H        | 1.66550  | -2.57847 | -2.48261 | H        | 1.67233  | -2.41644 | -2.60612 |
| Cat.5-PC |          |          |          |          |          |          |          |
|          | O        | -0.21314 | 2.70721  | -0.10065 |          |          |          |
|          | C        | -1.31421 | 1.96877  | -0.28426 |          |          |          |
|          | N        | 1.74073  | 0.21567  | 1.13589  |          |          |          |
|          | C        | 2.19250  | -1.14958 | 1.36783  |          |          |          |
|          | H        | 3.17694  | -1.15224 | 1.85063  |          |          |          |
|          | H        | 1.49460  | -1.64083 | 2.04107  |          |          |          |
|          | C        | 2.63379  | 0.87821  | 0.19423  |          |          |          |
|          | H        | 3.64081  | 0.97056  | 0.61815  |          |          |          |
|          | H        | 2.25588  | 1.87761  | 0.00373  |          |          |          |
|          | C        | -0.32520 | 4.08366  | -0.44002 |          |          |          |
|          | H        | -0.56796 | 4.20248  | -1.49011 |          |          |          |
|          | H        | -1.08315 | 4.56873  | 0.16492  |          |          |          |
|          | C        | -3.69775 | -2.58592 | 0.08445  |          |          |          |
|          | C        | -4.02912 | -1.44589 | -0.63061 |          |          |          |
|          | C        | -2.50265 | -2.61302 | 0.78872  |          |          |          |
|          | C        | -1.65827 | -1.51686 | 0.78053  |          |          |          |



|   |          |          |          |
|---|----------|----------|----------|
| C | -1.99039 | -0.37052 | 0.05736  |
| C | -3.18879 | -0.34266 | -0.65443 |
| H | -3.45826 | 0.53213  | -1.21378 |
| H | -4.95312 | -1.40798 | -1.18579 |
| H | -2.22504 | -3.48814 | 1.35447  |
| H | -0.73784 | -1.53999 | 1.34046  |
| N | -1.07150 | 0.68659  | 0.07392  |
| O | -2.35215 | 2.42287  | -0.70784 |
| H | -0.13759 | 0.48352  | 0.43497  |
| H | 0.64544  | 4.51464  | -0.23287 |
| H | -4.35806 | -3.43780 | 0.09373  |
| C | 2.70767  | 0.10500  | -1.10738 |
| H | 3.40804  | 0.59715  | -1.77830 |
| H | 1.72208  | 0.11867  | -1.59229 |
| C | 1.64449  | 0.95603  | 2.37857  |
| H | 1.26505  | 1.95410  | 2.17957  |
| H | 0.95488  | 0.45403  | 3.05232  |
| H | 2.61179  | 1.04785  | 2.88456  |
| C | 2.27325  | -1.92051 | 0.06495  |
| H | 1.26443  | -2.03295 | -0.35385 |
| H | 2.65696  | -2.91874 | 0.26293  |
| N | 3.15963  | -1.25392 | -0.87129 |
| C | 3.28286  | -1.99568 | -2.10519 |
| H | 3.98398  | -1.49491 | -2.76858 |
| H | 3.66292  | -2.99356 | -1.89949 |
| H | 2.32831  | -2.09956 | -2.63667 |

| Cat.6 |          |          |          | Cat.6-RC1 |          |          |          |
|-------|----------|----------|----------|-----------|----------|----------|----------|
| C     | -1.18978 | -0.77507 | -0.68701 | O         | -3.05174 | -0.73183 | 0.00168  |
| H     | -1.18952 | -1.16889 | -1.70068 | C         | -3.73090 | 0.49047  | -0.00021 |
| H     | -2.06783 | -1.16936 | -0.18084 | H         | -3.52606 | 1.08600  | -0.89409 |
| N     | 0.00002  | 1.27718  | 0.00021  | H         | -4.79915 | 0.28679  | 0.02156  |
| N     | -0.00002 | -1.27718 | 0.00021  | H         | -2.09416 | -0.53914 | -0.01232 |
| C     | 1.18978  | 0.77507  | -0.68701 | H         | -3.49383 | 1.10630  | 0.87169  |
| H     | 1.18952  | 1.16889  | -1.70068 | C         | 1.56010  | 1.44797  | -0.31429 |
| H     | 2.06783  | 1.16936  | -0.18084 | H         | 1.84010  | 2.19523  | 0.42395  |
| C     | 1.18976  | -0.77511 | -0.68700 | H         | 1.92095  | 1.78818  | -1.28164 |
| H     | 2.06779  | -1.16942 | -0.18079 | N         | -0.28094 | -0.16558 | -0.01671 |
| H     | 1.18952  | -1.16895 | -1.70066 | N         | 2.24093  | 0.19712  | 0.01678  |
| C     | -1.18976 | 0.77511  | -0.68700 | C         | 0.25110  | -0.48092 | 1.31297  |
| H     | -1.18952 | 1.16895  | -1.70066 | H         | -0.25099 | 0.15514  | 2.03710  |
| H     | -2.06779 | 1.16942  | -0.18079 | H         | -0.00465 | -1.51172 | 1.54329  |
| C     | 0.00002  | 0.77481  | 1.37391  | C         | 1.78386  | -0.25921 | 1.32855  |
| H     | -0.87746 | 1.16915  | 1.88105  | H         | 2.31002  | -1.17860 | 1.57276  |
| H     | 0.87755  | 1.16910  | 1.88103  | H         | 2.06424  | 0.48773  | 2.06698  |
| C     | -0.00002 | -0.77481 | 1.37391  | C         | 0.02612  | 1.23239  | -0.33557 |
| H     | 0.87746  | -1.16915 | 1.88105  | H         | -0.47431 | 1.86343  | 0.39402  |
| H     | -0.87755 | -1.16910 | 1.88103  | H         | -0.39372 | 1.45667  | -1.31250 |
|       |          |          |          | C         | 0.36150  | -1.03499 | -1.00758 |
|       |          |          |          | H         | -0.06018 | -0.80511 | -1.98241 |
|       |          |          |          | H         | 0.10589  | -2.06417 | -0.76976 |

|           |          |          |          |           |          |          |          |
|-----------|----------|----------|----------|-----------|----------|----------|----------|
|           |          |          |          | C         | 1.89395  | -0.81104 | -0.98410 |
|           |          |          |          | H         | 2.42037  | -1.73027 | -0.73994 |
|           |          |          |          | H         | 2.25508  | -0.47071 | -1.95131 |
| Cat.6-RC2 |          |          |          | Cat.6-TS1 |          |          |          |
| O         | -0.17638 | -0.15745 | 1.59462  | O         | -0.32147 | 2.16826  | -0.57454 |
| C         | -1.45718 | 1.92240  | -0.27904 | C         | 1.42922  | 1.77543  | -0.09302 |
| C         | -0.04788 | 0.62539  | 2.75012  | C         | -0.85674 | 3.36980  | -0.05164 |
| H         | 0.22679  | 1.65672  | 2.52455  | H         | -1.09866 | 3.27395  | 1.00439  |
| H         | -1.00873 | 0.63854  | 3.25859  | H         | -0.11246 | 4.14618  | -0.17552 |
| C         | -5.27175 | -1.62455 | -0.15115 | C         | 4.92500  | -1.78435 | 0.16344  |
| C         | -4.03670 | -1.71632 | 0.47580  | C         | 4.96155  | -0.44176 | 0.51001  |
| C         | -5.57675 | -0.50121 | -0.90563 | C         | 3.75191  | -2.31797 | -0.35151 |
| C         | -4.65553 | 0.52530  | -1.03441 | C         | 2.63275  | -1.51991 | -0.51630 |
| C         | -3.42224 | 0.42441  | -0.40213 | C         | 2.66296  | -0.16967 | -0.16895 |
| C         | -3.10476 | -0.69813 | 0.35682  | C         | 3.84532  | 0.36391  | 0.34771  |
| H         | -2.14142 | -0.75570 | 0.83839  | H         | 3.89271  | 1.40398  | 0.62235  |
| H         | -3.79383 | -2.58730 | 1.06338  | H         | 5.86606  | -0.01247 | 0.91138  |
| H         | -6.53306 | -0.42055 | -1.39654 | H         | 3.70592  | -3.35977 | -0.62686 |
| H         | -4.88091 | 1.40280  | -1.61729 | H         | 1.72065  | -1.93119 | -0.91746 |
| N         | -2.52392 | 1.47563  | -0.55355 | N         | 1.47696  | 0.55951  | -0.36895 |
| O         | -0.45152 | 2.49163  | -0.10286 | O         | 1.88400  | 2.79517  | 0.28763  |
| H         | 0.68736  | -0.16572 | 1.13149  | H         | -0.94734 | 1.39403  | -0.38656 |
| H         | 0.69148  | 0.21913  | 3.44422  | H         | -1.74994 | 3.64041  | -0.60768 |
| H         | -5.99015 | -2.42205 | -0.05219 | H         | 5.79698  | -2.40490 | 0.29228  |
| C         | 4.57783  | 0.66829  | -0.02399 | C         | -4.43716 | -0.39181 | 0.22420  |
| H         | 5.40368  | 0.45956  | 0.65136  | H         | -5.16262 | -0.43182 | -0.58396 |
| H         | 4.80891  | 1.58909  | -0.55354 | H         | -4.98395 | -0.25746 | 1.15374  |
| N         | 2.30557  | -0.23838 | 0.28580  | N         | -2.06713 | 0.20763  | -0.09501 |
| N         | 4.49830  | -0.41705 | -1.00024 | N         | -3.73995 | -1.67505 | 0.28023  |
| C         | 2.90294  | -1.56018 | 0.50015  | C         | -2.01684 | -0.73707 | -1.21969 |
| H         | 3.06813  | -1.68666 | 1.56678  | H         | -2.24408 | -0.18632 | -2.12812 |
| H         | 2.18440  | -2.31178 | 0.18427  | H         | -0.99957 | -1.10742 | -1.30084 |
| C         | 4.22721  | -1.66961 | -0.29604 | C         | -3.02786 | -1.88370 | -0.97911 |
| H         | 4.17743  | -2.46961 | -1.03041 | H         | -2.52286 | -2.84484 | -0.93107 |
| H         | 5.06471  | -1.87949 | 0.36447  | H         | -3.75852 | -1.93351 | -1.78211 |
| C         | 3.24182  | 0.79073  | 0.75029  | C         | -3.42578 | 0.76027  | 0.00484  |
| H         | 3.38778  | 0.65854  | 1.81902  | H         | -3.63464 | 1.30717  | -0.91024 |
| H         | 2.77980  | 1.76178  | 0.59558  | H         | -3.44141 | 1.46772  | 0.82886  |
| C         | 2.06028  | -0.05036 | -1.14814 | C         | -1.74570 | -0.50401 | 1.14975  |
| H         | 1.58379  | 0.91619  | -1.28372 | H         | -1.76382 | 0.21680  | 1.96241  |
| H         | 1.35852  | -0.81454 | -1.47197 | H         | -0.73323 | -0.88603 | 1.06532  |
| C         | 3.39757  | -0.14422 | -1.92350 | C         | -2.77062 | -1.64201 | 1.37414  |
| H         | 3.36635  | -0.93988 | -2.66361 | H         | -2.27510 | -2.60810 | 1.42179  |
| H         | 3.61330  | 0.78439  | -2.44596 | H         | -3.31165 | -1.50133 | 2.30618  |
| Cat.6-IM  |          |          |          | Cat.6-TS2 |          |          |          |
| O         | 0.14149  | 2.59912  | 0.20827  | O         | 0.07459  | 2.51179  | -0.18788 |
| C         | 1.32671  | 1.92174  | 0.11972  | C         | -1.14838 | 1.91681  | -0.13302 |
| C         | 0.22544  | 4.00490  | 0.12622  | C         | 0.07687  | 3.92583  | -0.16186 |
| H         | 0.82105  | 4.41612  | 0.93596  | H         | -0.45510 | 4.33629  | -1.01434 |
| H         | 0.65471  | 4.32449  | -0.81888 | H         | -0.37318 | 4.30450  | 0.75037  |
| C         | 4.07819  | -2.35083 | -0.09055 | C         | -4.21958 | -2.12015 | 0.08982  |

|          |          |          |          |          |          |          |          |
|----------|----------|----------|----------|----------|----------|----------|----------|
| C        | 4.30913  | -1.09472 | -0.63267 | C        | -4.30164 | -0.89233 | 0.73155  |
| C        | 2.87159  | -2.57964 | 0.55782  | C        | -3.08153 | -2.41195 | -0.64800 |
| C        | 1.92551  | -1.57516 | 0.65777  | C        | -2.05024 | -1.49230 | -0.74248 |
| C        | 2.13905  | -0.29771 | 0.11331  | C        | -2.11658 | -0.25288 | -0.09549 |
| C        | 3.36632  | -0.08256 | -0.53709 | C        | -3.27066 | 0.02984  | 0.64714  |
| H        | 3.57104  | 0.88355  | -0.95826 | H        | -3.35357 | 0.97571  | 1.14960  |
| H        | 5.23940  | -0.89434 | -1.14308 | H        | -5.17786 | -0.64716 | 1.31219  |
| H        | 2.66587  | -3.54572 | 0.99328  | H        | -2.99588 | -3.35751 | -1.16086 |
| H        | 0.99592  | -1.76197 | 1.17286  | H        | -1.17849 | -1.72204 | -1.33371 |
| N        | 1.10167  | 0.61526  | 0.22081  | N        | -1.00906 | 0.58953  | -0.18564 |
| O        | 2.36856  | 2.55276  | -0.01129 | O        | -2.15941 | 2.59674  | -0.06711 |
| H        | -0.49765 | 0.14792  | 0.10758  | H        | 0.26531  | 0.08346  | -0.12960 |
| H        | -0.79192 | 4.37188  | 0.20402  | H        | 1.11820  | 4.22241  | -0.20519 |
| H        | 4.81884  | -3.13052 | -0.16938 | H        | -5.02580 | -2.83247 | 0.16167  |
| C        | -3.77518 | 0.29624  | -0.77708 | C        | 3.46529  | -0.16783 | 1.30831  |
| H        | -4.06456 | 0.23144  | -1.82100 | H        | 3.65377  | -0.68187 | 2.24597  |
| H        | -4.47715 | 0.95346  | -0.27409 | H        | 4.11987  | 0.69747  | 1.26490  |
| N        | -1.51029 | -0.19544 | 0.01501  | N        | 1.40677  | -0.30993 | -0.02446 |
| N        | -3.87504 | -1.03384 | -0.18582 | N        | 3.81163  | -1.06262 | 0.20774  |
| C        | -1.51723 | -1.43864 | -0.80125 | C        | 1.45428  | -1.78705 | 0.05085  |
| H        | -1.10254 | -1.18546 | -1.76981 | H        | 0.82433  | -2.09643 | 0.87744  |
| H        | -0.85933 | -2.14814 | -0.31549 | H        | 1.03106  | -2.17609 | -0.86790 |
| C        | -2.97432 | -1.94125 | -0.88809 | C        | 2.92602  | -2.22191 | 0.23830  |
| H        | -3.06150 | -2.92737 | -0.44361 | H        | 3.22306  | -2.90704 | -0.54986 |
| H        | -3.28922 | -2.01058 | -1.92419 | H        | 3.05772  | -2.72950 | 1.18909  |
| C        | -2.33889 | 0.84702  | -0.64762 | C        | 1.98530  | 0.26338  | 1.21194  |
| H        | -1.88156 | 1.05746  | -1.60682 | H        | 1.39462  | -0.10454 | 2.04413  |
| H        | -2.28090 | 1.73613  | -0.03510 | H        | 1.86682  | 1.33807  | 1.15629  |
| C        | -2.04110 | -0.47538 | 1.37450  | C        | 2.18010  | 0.14858  | -1.19941 |
| H        | -1.96659 | 0.44361  | 1.94343  | H        | 2.11589  | 1.22939  | -1.22460 |
| H        | -1.39400 | -1.21832 | 1.82566  | H        | 1.69136  | -0.24450 | -2.08452 |
| C        | -3.49644 | -0.96856 | 1.22192  | C        | 3.63345  | -0.35692 | -1.05837 |
| H        | -3.60808 | -1.95626 | 1.65728  | H        | 3.88392  | -1.03645 | -1.86732 |
| H        | -4.17913 | -0.29705 | 1.73240  | H        | 4.33096  | 0.47451  | -1.09295 |
| Cat.6-PC |          |          |          |          |          |          |          |
|          | O        | 0.36001  | 2.62527  | 0.03270  |          |          |          |
|          | C        | 1.52203  | 1.96363  | 0.02206  |          |          |          |
|          | C        | 0.45247  | 4.04337  | 0.04865  |          |          |          |
|          | H        | 0.96905  | 4.38628  | 0.93834  |          |          |          |
|          | H        | 0.96965  | 4.40621  | -0.83274 |          |          |          |
|          | C        | 4.03360  | -2.54567 | -0.00110 |          |          |          |
|          | C        | 4.49260  | -1.24581 | -0.14030 |          |          |          |
|          | C        | 2.67045  | -2.76211 | 0.14179  |          |          |          |
|          | C        | 1.78668  | -1.69815 | 0.14714  |          |          |          |
|          | C        | 2.24837  | -0.38803 | 0.00537  |          |          |          |
|          | C        | 3.61824  | -0.16870 | -0.14032 |          |          |          |
|          | H        | 3.99026  | 0.83113  | -0.24912 |          |          |          |
|          | H        | 5.54855  | -1.05666 | -0.25356 |          |          |          |
|          | H        | 2.28822  | -3.76443 | 0.25280  |          |          |          |
|          | H        | 0.73072  | -1.87789 | 0.26397  |          |          |          |
|          | N        | 1.28833  | 0.63065  | 0.00692  |          |          |          |

|   |          |          |          |
|---|----------|----------|----------|
| O | 2.59794  | 2.51753  | 0.02715  |
| H | 0.30528  | 0.34516  | 0.01497  |
| H | -0.56867 | 4.40146  | 0.05243  |
| H | 4.72292  | -3.37428 | -0.00337 |
| C | -3.94580 | 0.58377  | -0.19536 |
| H | -4.42277 | 0.86174  | -1.13208 |
| H | -4.48748 | 1.07591  | 0.60875  |
| N | -1.61343 | -0.20536 | -0.01588 |
| N | -4.08216 | -0.86175 | -0.02274 |
| C | -1.88416 | -1.13594 | -1.11639 |
| H | -1.60431 | -0.64832 | -2.04659 |
| H | -1.24360 | -2.00483 | -0.99279 |
| C | -3.38099 | -1.53528 | -1.11441 |
| H | -3.49968 | -2.60831 | -0.98560 |
| H | -3.86117 | -1.26016 | -2.05019 |
| C | -2.45026 | 0.98702  | -0.18884 |
| H | -2.16308 | 1.46875  | -1.11902 |
| H | -2.22532 | 1.67650  | 0.61889  |
| C | -1.96615 | -0.85108 | 1.25230  |
| H | -1.74202 | -0.15711 | 2.05826  |
| H | -1.32805 | -1.72162 | 1.37889  |
| C | -3.46403 | -1.24610 | 1.24536  |
| H | -3.58682 | -2.31868 | 1.37409  |
| H | -4.00276 | -0.75353 | 2.05104  |

| Cat.7 |          |          |          | Cat.7-RC1 |          |          |          |
|-------|----------|----------|----------|-----------|----------|----------|----------|
| N     | -3.52982 | -0.56959 | 0.32800  | O         | 3.63241  | 1.08940  | 1.13697  |
| C     | -4.05223 | -0.84808 | -0.99474 | N         | 2.50914  | -0.86989 | -0.59599 |
| H     | -3.28723 | -1.28787 | -1.62675 | C         | 3.52566  | -1.17208 | -1.58868 |
| H     | -4.86967 | -1.56062 | -0.91920 | H         | 3.18054  | -1.90176 | -2.32895 |
| H     | -4.43230 | 0.05184  | -1.49633 | H         | 4.40645  | -1.57687 | -1.09789 |
| C     | -2.43681 | 0.39073  | 0.29973  | H         | 3.81173  | -0.26374 | -2.11140 |
| H     | -2.17918 | 0.63313  | 1.32844  | C         | 3.85956  | 0.47417  | 2.37374  |
| H     | -2.75503 | 1.32326  | -0.18192 | H         | 4.26882  | 1.21859  | 3.05274  |
| C     | -1.18564 | -0.16782 | -0.36902 | H         | 2.94394  | 0.08269  | 2.82369  |
| H     | -1.32363 | -0.22902 | -1.45521 | H         | 3.25730  | 0.41876  | 0.53464  |
| H     | -1.04836 | -1.18244 | -0.00411 | H         | 4.57886  | -0.34629 | 2.30886  |
| C     | 2.43255  | 0.31343  | 0.35271  | C         | 1.33879  | -0.26243 | -1.22005 |
| H     | 2.52687  | 1.39542  | 0.32842  | H         | 1.69856  | 0.51286  | -1.89056 |
| H     | 2.26439  | 0.03426  | 1.40132  | H         | 0.79834  | -0.99147 | -1.83429 |
| C     | -4.58994 | -0.10589 | 1.19851  | C         | 0.37703  | 0.35517  | -0.21242 |
| H     | -5.37850 | -0.85286 | 1.24780  | H         | -0.09012 | -0.42960 | 0.37195  |
| H     | -4.20464 | 0.04810  | 2.20328  | H         | 0.94107  | 0.98166  | 0.48702  |
| H     | -5.03922 | 0.83658  | 0.85921  | C         | -2.71488 | -0.15985 | -0.35063 |
| C     | 1.21806  | -0.10482 | -0.46747 | H         | -2.93233 | -0.22993 | -1.41334 |
| H     | 1.42821  | 0.05715  | -1.53159 | H         | -2.11132 | -1.03985 | -0.09473 |
| H     | 1.04553  | -1.16839 | -0.33787 | C         | 2.17668  | -2.06364 | 0.16384  |
| C     | -0.04444 | 1.93463  | -0.59621 | H         | 1.49018  | -1.82792 | 0.96988  |
| H     | -0.18190 | 1.92839  | -1.68522 | H         | 1.71868  | -2.83554 | -0.46439 |
| H     | -0.86123 | 2.49756  | -0.15581 | H         | 3.08058  | -2.47513 | 0.60374  |
| H     | 0.87216  | 2.47287  | -0.37869 | C         | -0.23462 | 2.46580  | -1.18238 |

|           |          |          |          |           |          |          |          |
|-----------|----------|----------|----------|-----------|----------|----------|----------|
| C         | 4.81652  | 0.41342  | 0.45804  | H         | -0.06143 | 3.06501  | -0.27991 |
| H         | 4.86085  | 0.26360  | 1.54466  | H         | 0.69122  | 2.44749  | -1.74969 |
| H         | 5.73750  | 0.02467  | 0.03031  | H         | -0.98328 | 2.97151  | -1.78658 |
| H         | 4.77979  | 1.48307  | 0.26753  | C         | -1.92175 | 1.12269  | -0.13478 |
| C         | 3.76473  | -1.67362 | 0.02559  | H         | -2.52980 | 1.94765  | -0.49632 |
| H         | 3.69980  | -1.97088 | 1.08062  | H         | -1.74496 | 1.30646  | 0.92983  |
| H         | 2.97337  | -2.18151 | -0.51657 | N         | -0.67087 | 1.11610  | -0.88190 |
| H         | 4.71370  | -2.03161 | -0.36551 | N         | -3.97761 | -0.16516 | 0.37217  |
| N         | 3.67791  | -0.23861 | -0.15458 | C         | -4.89899 | -1.12734 | -0.19578 |
| N         | 0.01218  | 0.59440  | -0.04194 | H         | -5.84820 | -1.08301 | 0.33286  |
|           |          |          |          | H         | -5.08236 | -0.89537 | -1.24173 |
|           |          |          |          | H         | -4.52945 | -2.15938 | -0.13605 |
|           |          |          |          | C         | -3.80016 | -0.42018 | 1.78756  |
|           |          |          |          | H         | -4.76236 | -0.36912 | 2.29130  |
|           |          |          |          | H         | -3.36689 | -1.40958 | 1.98496  |
|           |          |          |          | H         | -3.15159 | 0.32551  | 2.23609  |
| Cat.7-RC2 |          |          |          | Cat.7-TS1 |          |          |          |
| O         | 0.81743  | 1.98530  | -1.44130 | O         | 1.24757  | 2.13013  | -0.88534 |
| C         | 3.64330  | 1.68901  | -0.32226 | C         | 2.87256  | 1.25629  | -0.94065 |
| N         | -0.31290 | 1.54062  | 1.13569  | N         | -0.19136 | 1.76901  | 1.34665  |
| C         | 0.78009  | 1.50100  | 2.09181  | C         | 0.72270  | 1.79652  | 2.48095  |
| H         | 0.43064  | 1.33038  | 3.11578  | H         | 0.19596  | 1.66644  | 3.42997  |
| H         | 1.31919  | 2.44414  | 2.06979  | H         | 1.24425  | 2.74896  | 2.50474  |
| H         | 1.46993  | 0.70474  | 1.82872  | H         | 1.45584  | 1.00323  | 2.37839  |
| C         | 0.62570  | 3.33901  | -1.74626 | C         | 1.26195  | 3.51463  | -1.18450 |
| H         | 1.07464  | 3.53371  | -2.71735 | H         | 1.64443  | 4.09885  | -0.35102 |
| H         | -0.43184 | 3.60705  | -1.80954 | H         | 1.90368  | 3.65932  | -2.04411 |
| C         | 5.85817  | -2.92437 | 0.23674  | C         | 5.41727  | -2.82660 | 0.40034  |
| C         | 6.44193  | -1.67224 | 0.37250  | C         | 5.77117  | -1.75134 | -0.40121 |
| C         | 4.51440  | -3.02264 | -0.09250 | C         | 4.14757  | -2.86382 | 0.95934  |
| C         | 3.75483  | -1.88008 | -0.28586 | C         | 3.24629  | -1.84065 | 0.71935  |
| C         | 4.34461  | -0.63027 | -0.14781 | C         | 3.59613  | -0.75658 | -0.08534 |
| C         | 5.69266  | -0.52383 | 0.18194  | C         | 4.87458  | -0.72289 | -0.64604 |
| H         | 6.14192  | 0.45056  | 0.28636  | H         | 5.16734  | 0.10313  | -1.27148 |
| H         | 7.48576  | -1.58612 | 0.62790  | H         | 6.75424  | -1.70822 | -0.84305 |
| H         | 4.05254  | -3.99065 | -0.20038 | H         | 3.85541  | -3.69233 | 1.58505  |
| H         | 2.71053  | -1.94484 | -0.54256 | H         | 2.25965  | -1.86742 | 1.15272  |
| N         | 3.54960  | 0.49777  | -0.34873 | N         | 2.61323  | 0.23178  | -0.27548 |
| O         | 3.64544  | 2.85412  | -0.31180 | O         | 3.57992  | 1.94885  | -1.58314 |
| H         | 0.44399  | 1.82217  | -0.55380 | H         | 0.73485  | 1.95351  | -0.02990 |
| H         | 1.10112  | 4.00206  | -1.02157 | H         | 0.25584  | 3.84123  | -1.43040 |
| H         | 6.44634  | -3.81499 | 0.38653  | H         | 6.11966  | -3.62291 | 0.58621  |
| C         | -1.00112 | 0.25552  | 1.08395  | C         | -0.85763 | 0.46902  | 1.25974  |
| H         | -0.23924 | -0.51307 | 0.98838  | H         | -0.08084 | -0.28924 | 1.27476  |
| H         | -1.53835 | 0.05975  | 2.01901  | H         | -1.48866 | 0.30424  | 2.13836  |
| C         | -1.97357 | 0.14247  | -0.08360 | C         | -1.69893 | 0.30245  | 0.00042  |
| H         | -2.81621 | 0.80443  | 0.08113  | H         | -2.59114 | 0.91379  | 0.07485  |
| H         | -1.47855 | 0.47887  | -1.00094 | H         | -1.13870 | 0.66283  | -0.86900 |
| C         | -4.87043 | -0.99279 | 0.32494  | C         | -4.54351 | -1.00541 | 0.16361  |
| H         | -4.75584 | -1.75924 | 1.08717  | H         | -4.45685 | -1.76572 | 0.93556  |
| H         | -4.67754 | -0.03042 | 0.81567  | H         | -4.44597 | -0.03494 | 0.66628  |

|          |          |          |          |           |          |          |          |
|----------|----------|----------|----------|-----------|----------|----------|----------|
| C        | -1.21212 | 2.64062  | 1.44379  | C         | -1.14124 | 2.87162  | 1.43875  |
| H        | -1.97138 | 2.74352  | 0.67594  | H         | -1.74879 | 2.92787  | 0.54223  |
| H        | -1.71322 | 2.50318  | 2.40835  | H         | -1.80318 | 2.76227  | 2.30229  |
| H        | -0.64773 | 3.56792  | 1.48269  | H         | -0.59769 | 3.80603  | 1.53874  |
| C        | -1.57348 | -2.04007 | -1.00350 | C         | -1.08370 | -1.84607 | -0.87310 |
| H        | -1.51504 | -1.72106 | -2.05141 | H         | -0.97647 | -1.53734 | -1.92016 |
| H        | -0.56987 | -2.00127 | -0.58974 | H         | -0.11822 | -1.71815 | -0.39260 |
| H        | -1.90083 | -3.07630 | -0.98224 | H         | -1.32930 | -2.90476 | -0.85476 |
| C        | -3.83010 | -1.26862 | -0.75315 | C         | -3.39881 | -1.22368 | -0.81738 |
| H        | -4.01003 | -2.27084 | -1.13282 | H         | -3.48328 | -2.23741 | -1.19963 |
| H        | -3.94439 | -0.58624 | -1.60137 | H         | -3.48152 | -0.55514 | -1.68026 |
| N        | -2.47547 | -1.21987 | -0.21890 | N         | -2.10072 | -1.08815 | -0.17022 |
| N        | -6.23338 | -1.05607 | -0.18061 | N         | -5.84964 | -1.14018 | -0.46293 |
| C        | -7.17868 | -1.26194 | 0.89723  | C         | -6.87626 | -1.41305 | 0.52140  |
| H        | -8.18460 | -1.34468 | 0.49271  | H         | -7.83372 | -1.54965 | 0.02437  |
| H        | -6.94838 | -2.18430 | 1.42420  | H         | -6.64147 | -2.32651 | 1.06169  |
| H        | -7.17690 | -0.44305 | 1.62832  | H         | -6.99128 | -0.60420 | 1.25476  |
| C        | -6.59350 | 0.12427  | -0.94024 | C         | -6.20671 | 0.02596  | -1.24541 |
| H        | -7.60213 | 0.01336  | -1.33064 | H         | -7.16385 | -0.14059 | -1.73355 |
| H        | -6.56373 | 1.03912  | -0.33382 | H         | -6.29275 | 0.93273  | -0.63228 |
| H        | -5.92469 | 0.25931  | -1.78415 | H         | -5.46856 | 0.21276  | -2.01872 |
| Cat.7-IM |          |          |          | Cat.7-TS2 |          |          |          |
| O        | 1.08422  | 2.49500  | -0.08534 | O         | 0.93561  | 2.44849  | 0.03097  |
| C        | 2.21938  | 1.85729  | -0.50799 | C         | 2.08581  | 1.87149  | -0.40685 |
| N        | 0.33699  | 0.06198  | 1.91513  | N         | 0.43960  | -0.23163 | 1.78857  |
| C        | 1.12222  | -0.58263 | 2.98900  | C         | 1.23072  | -1.03930 | 2.72943  |
| H        | 0.46345  | -0.83410 | 3.81231  | H         | 0.59805  | -1.40384 | 3.53433  |
| H        | 1.88422  | 0.11089  | 3.32272  | H         | 2.02140  | -0.42301 | 3.14244  |
| H        | 1.58798  | -1.47773 | 2.59868  | H         | 1.66919  | -1.87922 | 2.20523  |
| C        | 0.91633  | 3.82184  | -0.53386 | C         | 0.69871  | 3.77017  | -0.41097 |
| H        | 0.85447  | 3.87154  | -1.61697 | H         | 0.62246  | 3.81722  | -1.49277 |
| H        | -0.01591 | 4.16935  | -0.10266 | H         | -0.24375 | 4.06824  | 0.03332  |
| C        | 5.35608  | -2.15180 | -0.64660 | C         | 5.47145  | -1.89613 | -0.67013 |
| C        | 5.57929  | -0.80844 | -0.91012 | C         | 5.66082  | -0.52318 | -0.59681 |
| C        | 4.10051  | -2.53503 | -0.19303 | C         | 4.18827  | -2.40096 | -0.51758 |
| C        | 3.10168  | -1.59607 | -0.01043 | C         | 3.11879  | -1.54800 | -0.30032 |
| C        | 3.30698  | -0.22971 | -0.27066 | C         | 3.29530  | -0.16165 | -0.21940 |
| C        | 4.58367  | 0.14019  | -0.73023 | C         | 4.59643  | 0.33542  | -0.37270 |
| H        | 4.77986  | 1.17235  | -0.94858 | H         | 4.76326  | 1.39543  | -0.32190 |
| H        | 6.54786  | -0.48561 | -1.26208 | H         | 6.65191  | -0.11088 | -0.70987 |
| H        | 3.89477  | -3.57358 | 0.01771  | H         | 4.01385  | -3.46431 | -0.57496 |
| H        | 2.12913  | -1.90983 | 0.33468  | H         | 2.12320  | -1.95022 | -0.19946 |
| N        | 2.24648  | 0.62368  | -0.01243 | N         | 2.17898  | 0.62484  | 0.06498  |
| O        | 2.99727  | 2.45172  | -1.24463 | O         | 2.84191  | 2.48773  | -1.14049 |
| H        | 1.03429  | 0.30931  | 1.14205  | H         | 1.22020  | 0.17948  | 0.95473  |
| H        | 1.72930  | 4.46093  | -0.20176 | H         | 1.48524  | 4.44293  | -0.08368 |
| H        | 6.13732  | -2.88071 | -0.79162 | H         | 6.30527  | -2.55725 | -0.84374 |
| C        | -0.65247 | -0.89017 | 1.34373  | C         | -0.57473 | -1.07307 | 1.11878  |
| H        | -0.09356 | -1.77352 | 1.05823  | H         | -0.04118 | -1.90782 | 0.67785  |
| H        | -1.34430 | -1.16348 | 2.13404  | H         | -1.25188 | -1.47133 | 1.87184  |
| C        | -1.40221 | -0.32687 | 0.14460  | C         | -1.36648 | -0.33897 | 0.04525  |

|          |          |          |          |          |          |          |          |
|----------|----------|----------|----------|----------|----------|----------|----------|
| H        | -2.09115 | 0.44054  | 0.47675  | H        | -2.03437 | 0.37476  | 0.51301  |
| H        | -0.70071 | 0.14788  | -0.54791 | H        | -0.69096 | 0.23071  | -0.59869 |
| C        | -4.49907 | -0.72823 | -0.07719 | C        | -4.47250 | -0.72914 | -0.07329 |
| H        | -4.68464 | -1.70168 | 0.36946  | H        | -4.62909 | -1.76275 | 0.22436  |
| H        | -4.17142 | -0.06705 | 0.73506  | H        | -4.10293 | -0.19880 | 0.81347  |
| C        | -0.28632 | 1.30480  | 2.41778  | C        | -0.15135 | 0.91284  | 2.49874  |
| H        | -0.75932 | 1.83172  | 1.60354  | H        | -0.65695 | 1.56316  | 1.80064  |
| H        | -1.01314 | 1.04693  | 3.18019  | H        | -0.84939 | 0.55805  | 3.25299  |
| H        | 0.48951  | 1.92966  | 2.84103  | H        | 0.64465  | 1.47141  | 2.97736  |
| C        | -1.34594 | -2.10953 | -1.46287 | C        | -1.39982 | -1.84609 | -1.82441 |
| H        | -1.06082 | -1.48997 | -2.32120 | H        | -1.15756 | -1.09771 | -2.58828 |
| H        | -0.43327 | -2.46677 | -0.99491 | H        | -0.46526 | -2.26807 | -1.46619 |
| H        | -1.89047 | -2.97433 | -1.83205 | H        | -1.96447 | -2.64483 | -2.29785 |
| C        | -3.39321 | -0.90637 | -1.10952 | C        | -3.42452 | -0.73006 | -1.17853 |
| H        | -3.72930 | -1.65025 | -1.82635 | H        | -3.79896 | -1.35414 | -1.98529 |
| H        | -3.21954 | 0.01628  | -1.67144 | H        | -3.28405 | 0.27194  | -1.59568 |
| N        | -2.15944 | -1.38945 | -0.50124 | N        | -2.15989 | -1.29120 | -0.72078 |
| N        | -5.74178 | -0.25466 | -0.66630 | N        | -5.74809 | -0.18517 | -0.51303 |
| C        | -6.86865 | -0.53404 | 0.19946  | C        | -6.82570 | -0.61903 | 0.35176  |
| H        | -7.78884 | -0.20844 | -0.27964 | H        | -7.77230 | -0.23408 | -0.01990 |
| H        | -6.94194 | -1.60277 | 0.38317  | H        | -6.88178 | -1.70445 | 0.36184  |
| H        | -6.79753 | -0.02601 | 1.17006  | H        | -6.70685 | -0.27489 | 1.38741  |
| C        | -5.69671 | 1.15828  | -0.98490 | C        | -5.72924 | 1.26136  | -0.59832 |
| H        | -6.62660 | 1.45406  | -1.46427 | H        | -6.68483 | 1.61723  | -0.97547 |
| H        | -5.56060 | 1.78541  | -0.09400 | H        | -5.55123 | 1.73680  | 0.37527  |
| H        | -4.88612 | 1.37349  | -1.67356 | H        | -4.95692 | 1.59844  | -1.28219 |
| Cat.7-PC |          |          |          |          |          |          |          |
|          | O        | -3.15438 | -2.36622 | -0.05925 |          |          |          |
|          | C        | -3.78789 | -1.20583 | -0.26085 |          |          |          |
|          | N        | -0.24082 | -0.87592 | 1.11236  |          |          |          |
|          | C        | 0.08251  | 0.10981  | 2.12706  |          |          |          |
|          | H        | 0.98520  | -0.13410 | 2.69468  |          |          |          |
|          | H        | -0.74214 | 0.18250  | 2.83254  |          |          |          |
|          | H        | 0.22292  | 1.08332  | 1.66638  |          |          |          |
|          | C        | -3.90531 | -3.54003 | -0.33898 |          |          |          |
|          | H        | -4.79053 | -3.58936 | 0.28546  |          |          |          |
|          | H        | -4.19667 | -3.57210 | -1.38303 |          |          |          |
|          | C        | -3.71676 | 3.93974  | -0.28801 |          |          |          |
|          | C        | -4.78055 | 3.05248  | -0.23836 |          |          |          |
|          | C        | -2.42313 | 3.44144  | -0.23217 |          |          |          |
|          | C        | -2.19928 | 2.07933  | -0.13413 |          |          |          |
|          | C        | -3.26981 | 1.18666  | -0.08001 |          |          |          |
|          | C        | -4.57056 | 1.68587  | -0.13020 |          |          |          |
|          | H        | -5.40380 | 1.01100  | -0.09062 |          |          |          |
|          | H        | -5.79302 | 3.42233  | -0.27778 |          |          |          |
|          | H        | -1.58019 | 4.11295  | -0.27197 |          |          |          |
|          | H        | -1.19175 | 1.69795  | -0.10676 |          |          |          |
|          | N        | -2.96876 | -0.17540 | 0.05245  |          |          |          |
|          | O        | -4.92535 | -1.13389 | -0.66711 |          |          |          |
|          | H        | -2.02341 | -0.41810 | 0.36211  |          |          |          |
|          | H        | -3.24650 | -4.36832 | -0.11312 |          |          |          |



|   |          |          |          |
|---|----------|----------|----------|
| H | -3.89178 | 5.00021  | -0.36938 |
| C | 0.65622  | -0.85338 | -0.03708 |
| H | 0.24659  | -1.53915 | -0.77488 |
| H | 0.61625  | 0.14355  | -0.47160 |
| C | 2.12310  | -1.19135 | 0.23222  |
| H | 2.51970  | -0.47678 | 0.94595  |
| H | 2.21543  | -2.18130 | 0.69258  |
| C | 4.55924  | 0.66177  | -0.48410 |
| H | 4.28458  | 1.17813  | -1.40039 |
| H | 3.89951  | 1.04726  | 0.30308  |
| C | -0.40707 | -2.19400 | 1.69739  |
| H | -0.64692 | -2.91307 | 0.92104  |
| H | 0.48124  | -2.54067 | 2.23275  |
| H | -1.23357 | -2.17156 | 2.40345  |
| C | 2.78432  | -2.31843 | -1.78430 |
| H | 3.19365  | -3.20449 | -1.28292 |
| H | 1.73931  | -2.51469 | -2.00362 |
| H | 3.30337  | -2.19558 | -2.73124 |
| C | 4.32076  | -0.82551 | -0.71206 |
| H | 4.90752  | -1.12152 | -1.57753 |
| H | 4.68571  | -1.41996 | 0.13174  |
| N | 2.91875  | -1.11372 | -0.98813 |
| N | 5.95224  | 0.96462  | -0.19207 |
| C | 6.25080  | 2.35660  | -0.45777 |
| H | 7.30461  | 2.54844  | -0.27040 |
| H | 6.04398  | 2.59009  | -1.49891 |
| H | 5.66794  | 3.04543  | 0.16754  |
| C | 6.31267  | 0.62941  | 1.17083  |
| H | 7.37094  | 0.82334  | 1.32749  |
| H | 5.74832  | 1.21345  | 1.90971  |
| H | 6.13593  | -0.42285 | 1.36950  |

| Cat.8 |          |          |          | Cat.8-RC1 |          |          |          |
|-------|----------|----------|----------|-----------|----------|----------|----------|
| C     | 0.00000  | 0.48668  | -0.09922 | O         | 2.27539  | 1.50446  | -0.77004 |
| H     | 0.00000  | 1.02211  | -1.04720 | N         | 1.55746  | -0.96803 | 0.39421  |
| H     | 0.00000  | 1.24115  | 0.69039  | C         | 2.56747  | -2.00139 | 0.24539  |
| C     | -1.26549 | -0.34623 | 0.01019  | H         | 2.25720  | -2.96655 | 0.65497  |
| H     | -1.25191 | -0.91584 | 0.94829  | H         | 3.48016  | -1.69282 | 0.74709  |
| H     | -1.29078 | -1.08068 | -0.79507 | H         | 2.79141  | -2.14074 | -0.80948 |
| C     | -3.67845 | -0.27552 | 0.03357  | C         | 2.48942  | 2.38087  | 0.29901  |
| H     | -4.53117 | 0.39824  | 0.01029  | H         | 2.68852  | 3.37065  | -0.10537 |
| H     | -3.77701 | -0.96752 | -0.80076 | H         | 1.62156  | 2.46037  | 0.95867  |
| H     | -3.73286 | -0.86217 | 0.95761  | H         | 2.06183  | 0.62843  | -0.39066 |
| C     | 1.26549  | -0.34623 | 0.01019  | H         | 3.34835  | 2.09417  | 0.91210  |
| H     | 1.29078  | -1.08068 | -0.79507 | C         | 0.27277  | -1.33995 | -0.18383 |
| H     | 1.25191  | -0.91584 | 0.94829  | H         | 0.42973  | -1.52612 | -1.24568 |
| N     | 2.45189  | 0.48364  | -0.10455 | H         | -0.10271 | -2.27393 | 0.24774  |
| H     | 2.42260  | 1.18128  | 0.62497  | C         | -0.74922 | -0.23098 | -0.00090 |
| N     | -2.45189 | 0.48364  | -0.10455 | H         | -0.86460 | -0.03032 | 1.06450  |
| H     | -2.42260 | 1.18128  | 0.62497  | H         | -0.37029 | 0.68097  | -0.45861 |
| C     | 3.67845  | -0.27552 | 0.03357  | C         | -2.09662 | -0.58132 | -0.61471 |

|           |          |          |          |           |          |          |          |
|-----------|----------|----------|----------|-----------|----------|----------|----------|
| H         | 4.53117  | 0.39824  | 0.01029  | H         | -1.95684 | -0.78699 | -1.67441 |
| H         | 3.73286  | -0.86217 | 0.95761  | H         | -2.47288 | -1.50576 | -0.15832 |
| H         | 3.77701  | -0.96752 | -0.80076 | H         | 1.42497  | -0.78271 | 1.37861  |
|           |          |          |          | N         | -3.05851 | 0.50520  | -0.50304 |
|           |          |          |          | H         | -3.81114 | 0.32368  | -1.14888 |
|           |          |          |          | C         | -3.62923 | 0.64750  | 0.82304  |
|           |          |          |          | H         | -4.42947 | 1.38238  | 0.79305  |
|           |          |          |          | H         | -4.03864 | -0.28651 | 1.22480  |
|           |          |          |          | H         | -2.88058 | 1.00760  | 1.52401  |
| Cat.8-RC2 |          |          |          | Cat.8-TS1 |          |          |          |
| O         | -0.83847 | 1.77177  | -1.20029 | O         | -0.36974 | 2.01166  | -0.55387 |
| C         | 2.03896  | 1.88908  | -0.18826 | C         | 1.42568  | 1.52730  | -0.71007 |
| N         | -1.60110 | 0.90912  | 1.38223  | N         | -1.60273 | 1.02957  | 1.59560  |
| C         | -0.52000 | 0.93326  | 2.35264  | C         | -0.74180 | 1.09787  | 2.76846  |
| H         | -0.82310 | 0.57447  | 3.34008  | H         | -1.22397 | 0.70176  | 3.66400  |
| H         | -0.14622 | 1.94802  | 2.45556  | H         | -0.46232 | 2.13088  | 2.95245  |
| H         | 0.29504  | 0.30532  | 2.00244  | H         | 0.16291  | 0.52586  | 2.58479  |
| C         | -1.33056 | 3.07614  | -1.32616 | C         | -0.65473 | 3.39632  | -0.59853 |
| H         | -1.07106 | 3.44387  | -2.31616 | H         | -0.34118 | 3.89934  | 0.31381  |
| H         | -2.41843 | 3.12300  | -1.22899 | H         | -0.12059 | 3.82067  | -1.43925 |
| C         | 5.02611  | -2.30644 | -0.12794 | C         | 4.76773  | -2.11410 | 0.01219  |
| C         | 5.39256  | -0.99244 | 0.12915  | C         | 4.89695  | -0.85569 | -0.55682 |
| C         | 3.71002  | -2.60072 | -0.45201 | C         | 3.52733  | -2.51810 | 0.48582  |
| C         | 2.76270  | -1.59190 | -0.51965 | C         | 2.43328  | -1.67497 | 0.39186  |
| C         | 3.13544  | -0.27929 | -0.26039 | C         | 2.55719  | -0.40864 | -0.17847 |
| C         | 4.45455  | 0.02376  | 0.06456  | C         | 3.80642  | -0.00565 | -0.65419 |
| H         | 4.73490  | 1.04546  | 0.26356  | H         | 3.92566  | 0.96777  | -1.09892 |
| H         | 6.41330  | -0.75435 | 0.38142  | H         | 5.85443  | -0.52771 | -0.92986 |
| H         | 3.41637  | -3.61813 | -0.65359 | H         | 3.40889  | -3.49364 | 0.93031  |
| H         | 1.73777  | -1.80887 | -0.77055 | H         | 1.46788  | -1.98607 | 0.75686  |
| N         | 2.15477  | 0.70899  | -0.33656 | N         | 1.39083  | 0.37565  | -0.23285 |
| O         | 1.83715  | 3.02930  | -0.05824 | O         | 1.95331  | 2.45787  | -1.20589 |
| H         | -1.06504 | 1.45936  | -0.30121 | H         | -0.80166 | 1.59742  | 0.26468  |
| H         | -0.89708 | 3.75925  | -0.59312 | H         | -1.72199 | 3.54116  | -0.74372 |
| H         | 5.76078  | -3.09332 | -0.07587 | H         | 5.62011  | -2.77005 | 0.08451  |
| C         | -2.19797 | -0.41129 | 1.22939  | C         | -2.08951 | -0.32080 | 1.32421  |
| H         | -1.41886 | -1.08726 | 0.87865  | H         | -1.22231 | -0.94828 | 1.12753  |
| H         | -2.54721 | -0.80395 | 2.19036  | H         | -2.59238 | -0.73406 | 2.20279  |
| C         | -3.34267 | -0.38109 | 0.23118  | C         | -3.02554 | -0.33777 | 0.12839  |
| H         | -4.09783 | 0.32215  | 0.58288  | H         | -3.85963 | 0.33670  | 0.32214  |
| H         | -2.97580 | -0.00494 | -0.72208 | H         | -2.50374 | 0.04302  | -0.74788 |
| C         | -3.96417 | -1.75455 | 0.02541  | C         | -3.54364 | -1.73737 | -0.16976 |
| H         | -3.19475 | -2.43832 | -0.32829 | H         | -2.69485 | -2.39487 | -0.34767 |
| H         | -4.31420 | -2.14188 | 0.99070  | H         | -4.06664 | -2.12441 | 0.71385  |
| H         | -2.31967 | 1.55310  | 1.68204  | H         | -2.39991 | 1.63346  | 1.74438  |
| N         | -5.02812 | -1.74086 | -0.96771 | N         | -4.38549 | -1.77698 | -1.35582 |
| H         | -5.19621 | -2.69142 | -1.25862 | H         | -4.46292 | -2.73752 | -1.65202 |
| C         | -6.27882 | -1.19279 | -0.47804 | C         | -5.72481 | -1.26264 | -1.14063 |
| H         | -7.05175 | -1.33303 | -1.22923 | H         | -6.32726 | -1.44720 | -2.02619 |
| H         | -6.62225 | -1.65395 | 0.45512  | H         | -6.23339 | -1.71480 | -0.28144 |
| H         | -6.18389 | -0.12439 | -0.30185 | H         | -5.69928 | -0.18786 | -0.98028 |

| Cat.8-IM |          |          |          | Cat.8-TS2 |          |          |          |
|----------|----------|----------|----------|-----------|----------|----------|----------|
| O        | 0.19855  | 2.46830  | -0.38408 | O         | 0.12469  | 2.47634  | -0.34114 |
| C        | 1.25931  | 1.64110  | -0.64783 | C         | 1.17364  | 1.66506  | -0.65092 |
| C        | 0.17789  | 3.69119  | -1.08888 | C         | 0.07599  | 3.71385  | -1.02358 |
| H        | 0.13059  | 3.53028  | -2.16181 | H         | -0.00710 | 3.56928  | -2.09621 |
| H        | -0.71498 | 4.21141  | -0.76096 | H         | -0.80717 | 4.22217  | -0.65506 |
| C        | 3.83392  | -2.70885 | 0.08902  | C         | 3.83233  | -2.65655 | -0.00690 |
| C        | 4.12880  | -1.58690 | -0.67014 | C         | 4.15620  | -1.46646 | -0.63973 |
| C        | 2.65218  | -2.71820 | 0.81985  | C         | 2.59809  | -2.75673 | 0.62108  |
| C        | 1.79595  | -1.63396 | 0.78691  | C         | 1.71540  | -1.69223 | 0.61375  |
| C        | 2.07561  | -0.48662 | 0.02202  | C         | 2.02920  | -0.47957 | -0.02075 |
| C        | 3.27629  | -0.49302 | -0.71063 | C         | 3.27978  | -0.39148 | -0.65165 |
| H        | 3.52591  | 0.36266  | -1.30754 | H         | 3.55082  | 0.51835  | -1.15088 |
| H        | 5.04154  | -1.55529 | -1.24646 | H         | 5.11014  | -1.36428 | -1.13472 |
| H        | 2.39405  | -3.57724 | 1.42048  | H         | 2.31642  | -3.67153 | 1.11953  |
| H        | 0.88104  | -1.66036 | 1.35838  | H         | 0.75839  | -1.79825 | 1.09908  |
| N        | 1.14237  | 0.53337  | 0.07737  | N         | 1.08296  | 0.53477  | 0.05479  |
| O        | 2.10753  | 2.00022  | -1.45468 | O         | 2.00239  | 2.02479  | -1.47149 |
| H        | 1.05245  | 4.29453  | -0.86454 | H         | 0.95616  | 4.31406  | -0.81569 |
| H        | 4.50420  | -3.55316 | 0.11171  | H         | 4.52129  | -3.48585 | -0.00417 |
| N        | -1.00801 | 0.62647  | 1.76634  | N         | -0.85410 | 0.47578  | 1.77173  |
| H        | -1.02889 | -0.23528 | 2.30359  | H         | -0.83562 | -0.42923 | 2.22888  |
| H        | -0.17601 | 0.54208  | 1.08761  | H         | 0.02830  | 0.46739  | 0.95317  |
| C        | -0.74916 | 1.75212  | 2.68129  | C         | -0.54221 | 1.51017  | 2.76421  |
| H        | 0.19163  | 1.57475  | 3.18809  | H         | 0.42988  | 1.29922  | 3.19568  |
| H        | -0.68436 | 2.65993  | 2.09671  | H         | -0.51114 | 2.47097  | 2.26535  |
| H        | -1.55228 | 1.82521  | 3.40481  | H         | -1.29211 | 1.52791  | 3.54899  |
| C        | -2.27202 | 0.74630  | 1.00399  | C         | -2.16810 | 0.65219  | 1.12801  |
| H        | -2.17922 | 1.63572  | 0.39145  | H         | -2.13620 | 1.60145  | 0.60411  |
| H        | -3.07524 | 0.89652  | 1.71908  | H         | -2.93001 | 0.71481  | 1.90221  |
| C        | -2.51250 | -0.48744 | 0.15591  | C         | -2.46435 | -0.48549 | 0.16848  |
| H        | -2.53411 | -1.36491 | 0.80085  | H         | -2.43090 | -1.42836 | 0.71314  |
| H        | -1.69115 | -0.61918 | -0.54522 | H         | -1.69561 | -0.52916 | -0.60028 |
| C        | -3.81734 | -0.37325 | -0.62099 | C         | -3.82240 | -0.31292 | -0.49792 |
| H        | -3.77086 | 0.50909  | -1.25574 | H         | -3.83199 | 0.63374  | -1.03430 |
| H        | -4.64350 | -0.21733 | 0.08375  | H         | -4.59827 | -0.24989 | 0.27525  |
| N        | -4.04609 | -1.52362 | -1.47986 | N         | -4.09997 | -1.36716 | -1.46021 |
| H        | -4.73642 | -1.26710 | -2.16817 | H         | -4.84590 | -1.05353 | -2.06140 |
| C        | -4.52588 | -2.69674 | -0.77362 | C         | -4.50516 | -2.62214 | -0.85552 |
| H        | -5.40148 | -2.49962 | -0.14489 | H         | -5.33185 | -2.51732 | -0.14375 |
| H        | -4.79204 | -3.46549 | -1.49415 | H         | -4.81539 | -3.31252 | -1.63541 |
| H        | -3.74565 | -3.10328 | -0.13527 | H         | -3.67147 | -3.07836 | -0.32800 |
| Cat.8-PC |          |          |          |           |          |          |          |
|          | O        | 0.33064  | 2.54849  |           | -0.37089 |          |          |
|          | C        | 1.34879  | 1.72994  |           | -0.66638 |          |          |
|          | C        | 0.31772  | 3.79345  |           | -1.05669 |          |          |
|          | H        | 0.24627  | 3.64245  |           | -2.12819 |          |          |
|          | H        | -0.55949 | 4.31514  |           | -0.69706 |          |          |
|          | C        | 3.70426  | -2.80439 |           | 0.09257  |          |          |
|          | C        | 4.04127  | -1.72733 |           | -0.71108 |          |          |
|          | C        | 2.55405  | -2.72911 |           | 0.86581  |          |          |

|   |          |          |          |
|---|----------|----------|----------|
| C | 1.75817  | -1.59877 | 0.83302  |
| C | 2.09737  | -0.51310 | 0.02196  |
| C | 3.25346  | -0.58600 | -0.75476 |
| H | 3.52781  | 0.23914  | -1.38259 |
| H | 4.93171  | -1.76669 | -1.31872 |
| H | 2.27082  | -3.55454 | 1.49952  |
| H | 0.86562  | -1.54909 | 1.43541  |
| N | 1.23705  | 0.58904  | 0.05019  |
| O | 2.21444  | 2.01474  | -1.46280 |
| H | 1.20941  | 4.36771  | -0.83072 |
| H | 4.32441  | -3.68562 | 0.11722  |
| N | -1.08481 | 0.50262  | 1.87350  |
| H | -1.15789 | -0.36967 | 2.37772  |
| H | 0.42676  | 0.52710  | 0.67719  |
| C | -0.84071 | 1.57211  | 2.82578  |
| H | 0.03960  | 1.33729  | 3.41777  |
| H | -0.65033 | 2.49698  | 2.28794  |
| H | -1.67961 | 1.74036  | 3.50698  |
| C | -2.30739 | 0.69681  | 1.10598  |
| H | -2.19598 | 1.61742  | 0.53600  |
| H | -3.17204 | 0.83300  | 1.76493  |
| C | -2.55647 | -0.46750 | 0.16285  |
| H | -2.59444 | -1.38990 | 0.74265  |
| H | -1.72127 | -0.56131 | -0.52967 |
| C | -3.84370 | -0.29817 | -0.63131 |
| H | -3.78843 | 0.63084  | -1.19579 |
| H | -4.68633 | -0.19771 | 0.06449  |
| N | -4.05703 | -1.37756 | -1.58397 |
| H | -4.75111 | -1.07399 | -2.24921 |
| C | -4.52457 | -2.60961 | -0.97730 |
| H | -5.40134 | -2.47444 | -0.33358 |
| H | -4.78480 | -3.31885 | -1.75869 |
| H | -3.73994 | -3.06010 | -0.37493 |
